# Supplementary material
Source: publisher figshare collection journal article supplement (https://acs.figshare.com/ndownloader/files/13897640)

# SUPPORTING INFORMATION

## A tandem mass spectrometry sequence database search method for identification of O-fucosylated proteins by mass spectrometry.

*Kristian E. Swearingen<sup>1\*</sup>, Jimmy K. Eng<sup>2</sup>, David Shteynberg<sup>1</sup>, Vladimir Vigdorovich<sup>3</sup>, Timothy A. Springer<sup>4</sup>,  
Luis Mendoza<sup>1</sup>, Noah D. Sather<sup>3</sup>, Eric W. Deutsch<sup>1</sup>, Stefan H. I. Kappe<sup>3</sup>, Robert L. Moritz<sup>1\*</sup>*

<sup>1</sup> Institute for Systems Biology, Seattle, WA, USA

<sup>2</sup> Proteomics Resource, University of Washington, Seattle, WA, USA

<sup>3</sup> Center for Global Infectious Disease Research, Seattle Children's Research Institute, Seattle, WA, USA

<sup>4</sup> Harvard Medical School and Children's Hospital, Boston, MA, USA

\*To whom correspondence should be addressed.

kristian.swearingen@systemsbiology.org

[robert.moritz@systemsbiology.org](mailto:robert.moritz@systemsbiology.org)

# TABLE OF CONTENTS

**Fig S1.** MS<sup>n</sup> confirming the identity of fragment spectra arising from neutral loss of O-linked glycans

**Fig S2.** Neutral loss of O-linked and C-linked glycans at increasing collision energies.

**Fig S3.** Glycoforms identified by automated sequence database search of data from LC-MS/MS analysis of recombinant *P. falciparum* TRAP

**Fig S4.** Indistinguishable isobaric glycopeptides from recombinant *P. falciparum* TRAP.

**Fig S5.** Misidentification of a glycoform in LC-MS/MS of recombinant *P. falciparum* TRAP.

**Fig S6.** Representative XIC of glycosylated CSP from *P. falciparum* salivary gland sporozoites.

**Fig S7.** Representative XIC of glycosylated TRAP from *P. falciparum* salivary gland sporozoites.

**Fig S8.** Representative XIC of glycosylated CSP from *P. vivax* VK210 salivary gland sporozoites.

**Fig S9.** Representative XIC of glycosylated TRAP from *P. vivax* VK210 salivary gland sporozoites.

**Fig S10.** Representative XIC of glycosylated CSP from *P. vivax* VK247 salivary gland sporozoites.

**Fig S11.** Representative XIC of glycosylated TRAP from *P. vivax* VK247 salivary gland sporozoites.

**Fig S12.** Representative XIC of glycosylated CSP from *P. yoelii* salivary gland sporozoites.

**Fig S13.** Representative XIC of glycosylated TRAP from *P. yoelii* salivary gland sporozoites.

**Fig S14.** Automated identification of TSR glycosylation in *P. yoelii* salivary gland sporozoites.

**Fig S15.** Example false positive peptides showing neutral loss of O-linked glycans.

**Figure S1. MS<sup>n</sup> confirming the identity of fragment spectra arising from neutral loss of O-linked glycans.** A tryptic digest of recombinant *P. falciparum* circumsporozoite protein (CSP) TSR domain was infused into an LTQ-Orbitrap Elite by nanospray. Precursor ions for the unmodified or O-glucosylfucosylated peptide were isolated and fragmented. All spectra are collision-induced dissociation (CID) collected at high resolution in the Orbitrap. CE = normalized collision energy. Annotated fragment spectra were visualized using a development version of Lorikeet as implemented in the Trans-Proteomic Pipeline.

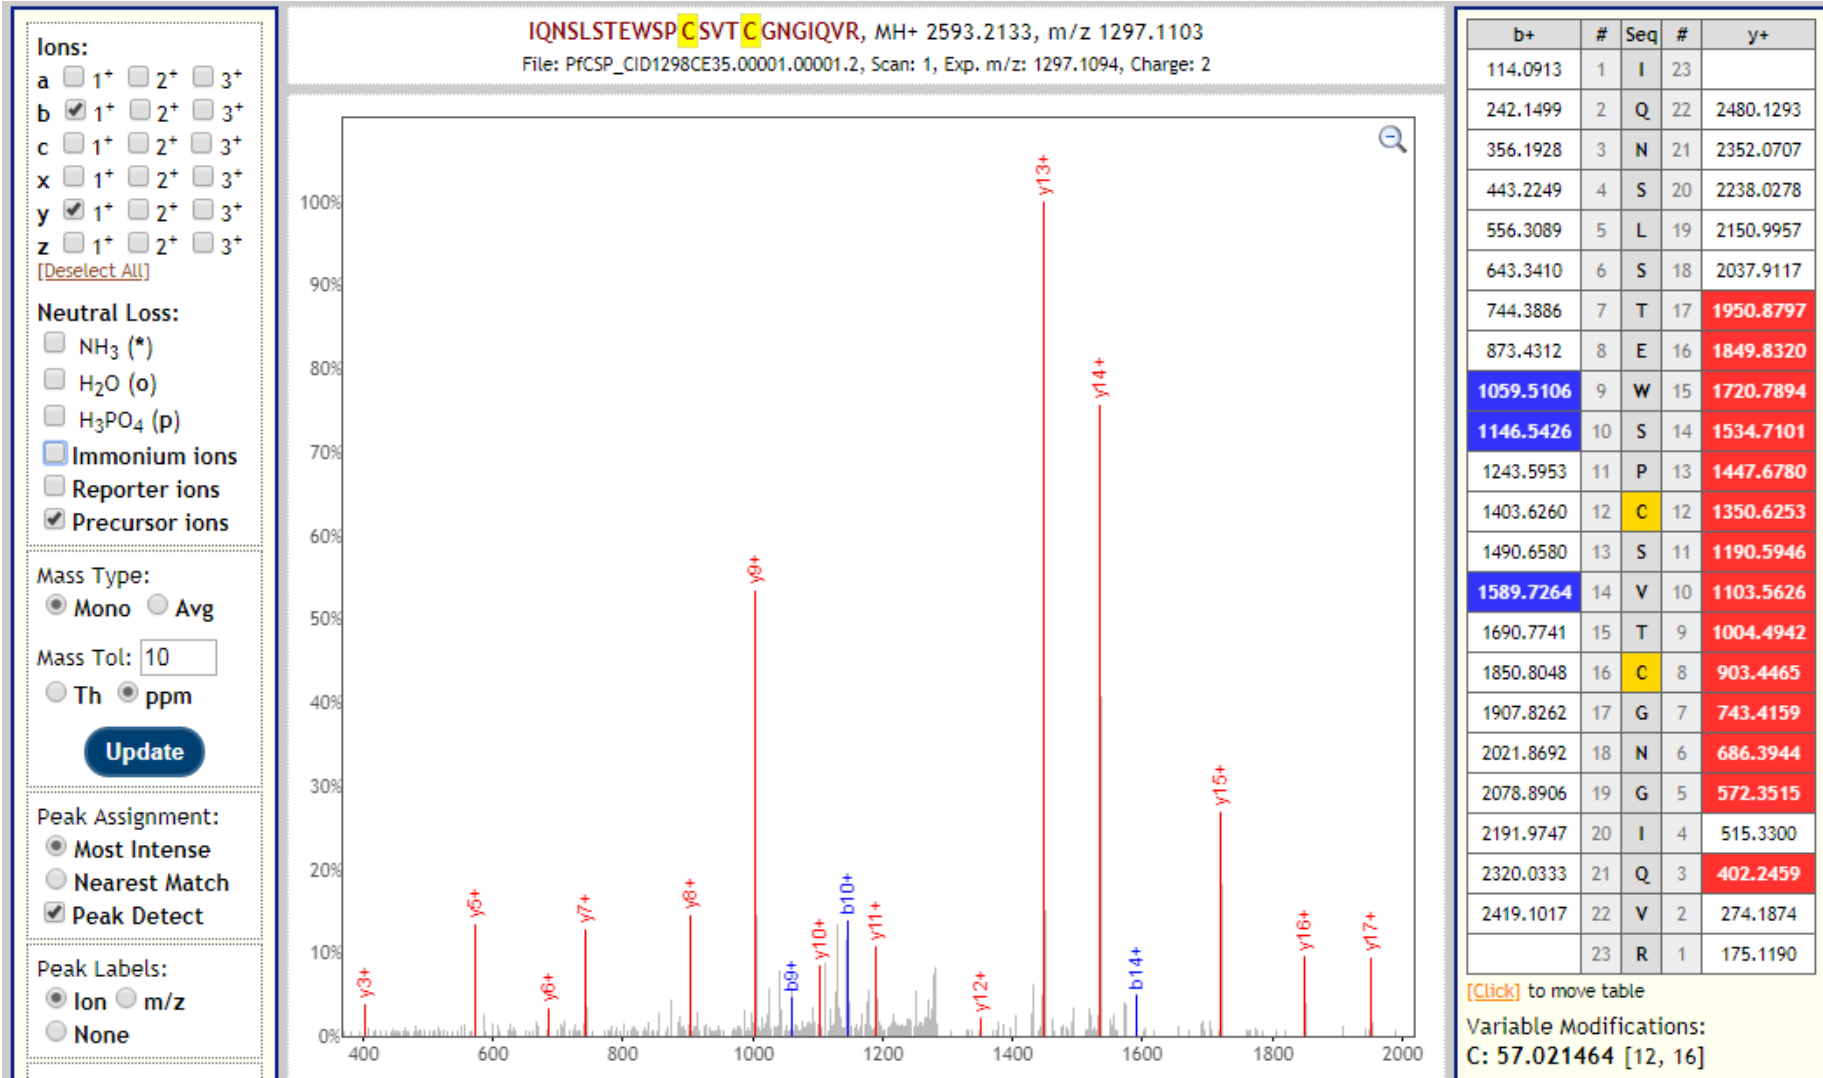

**S1a.** CID of the unmodified peptide, [M+2H]<sup>++</sup> = 1297 *m/z*, CE = 35 %. Note that the dominant peaks are y<sub>13</sub> and y<sub>14</sub>, the y-ion peaks containing the Pro residue. The y<sub>13</sub> and y<sub>14</sub> peaks are the only species visible in the spectra in Figure 1 still bearing the O-linked disaccharide.

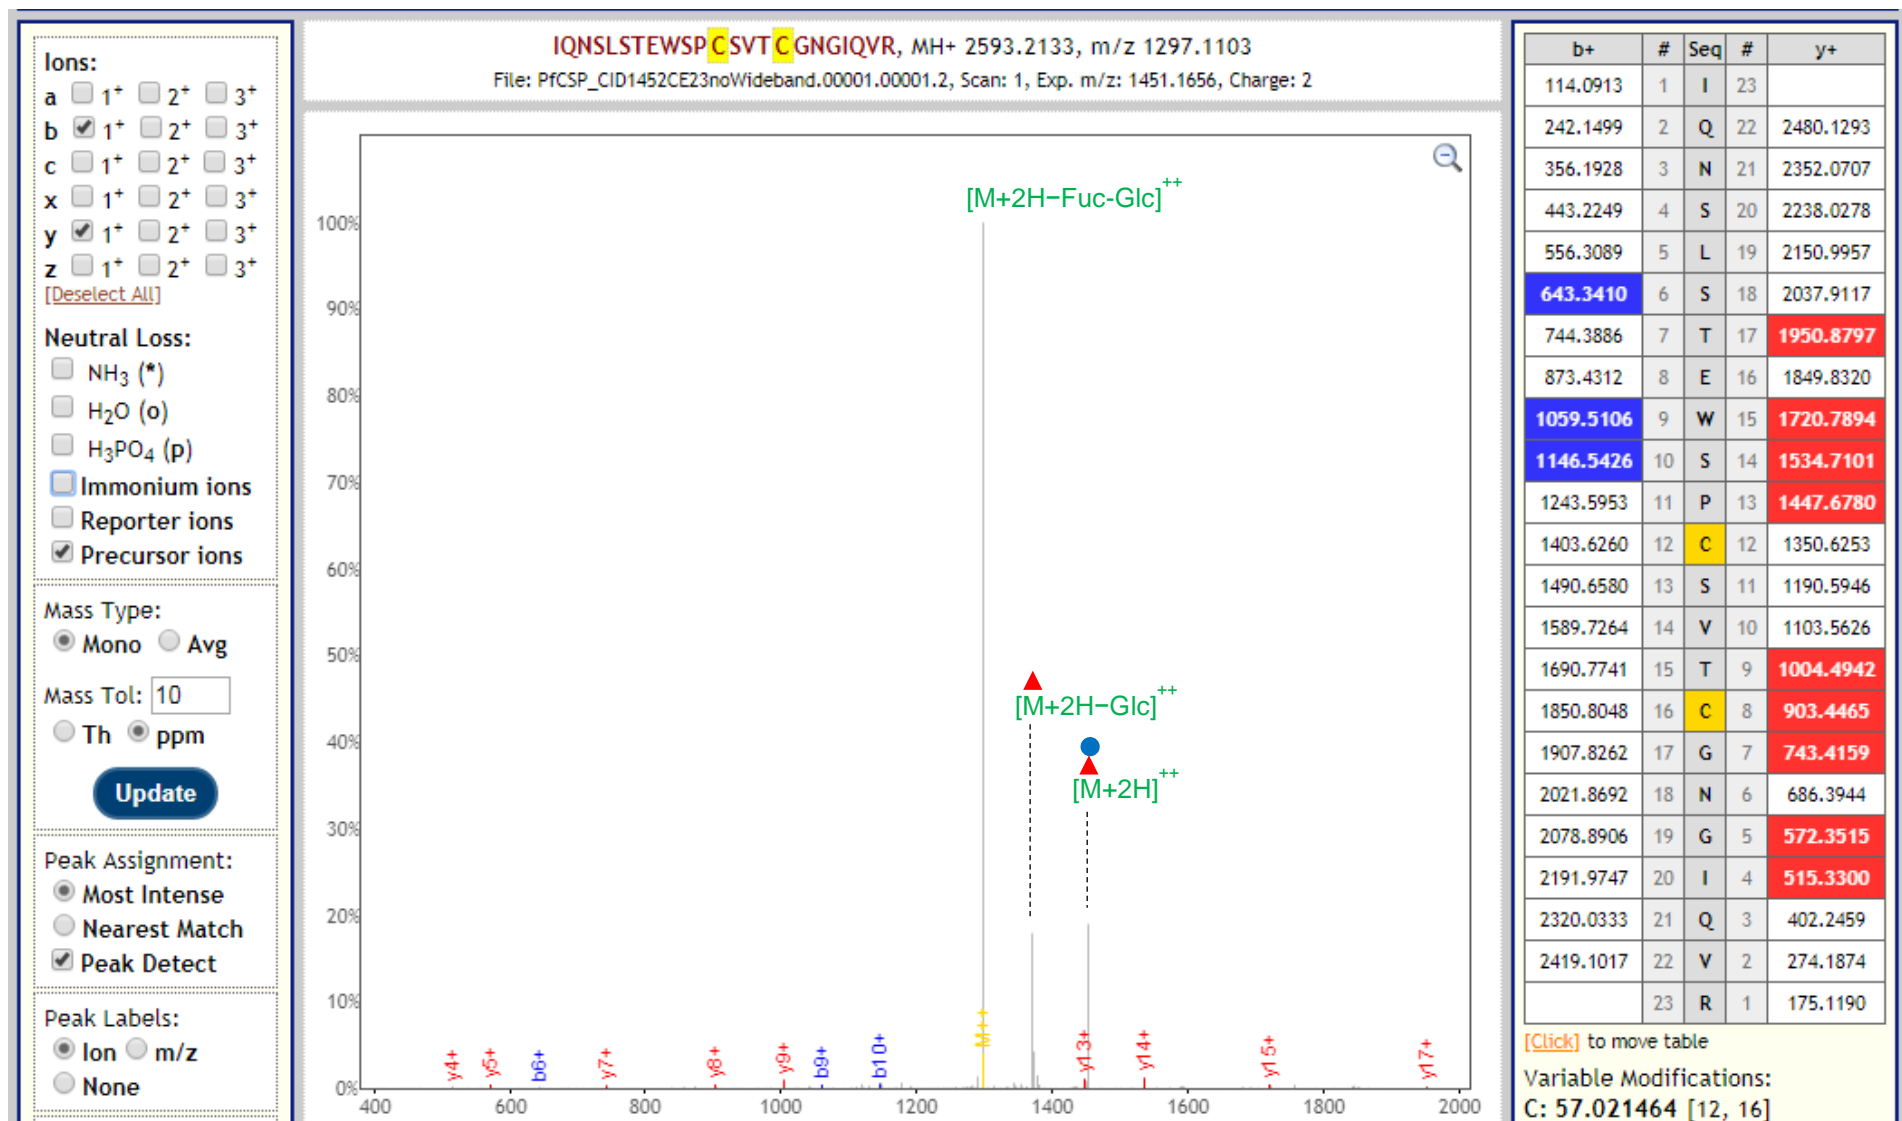

**Figure S1b.** CID of the peptide modified with O-Fuc-Glc,  $[M+2H]^{++} = 1451.17$   $m/z$ , CE = 23 %. At this CE, some of the precursor is still intact ( $[M+2H]^{++}$ , red triangle = O-Fuc, blue circle =  $\beta$ 1,3-Glc). Neutral loss of Glc can be seen as a peak at 1370.14  $m/z$  ( $[M+2H-Glc]^{++}$ , red triangle = O-Fuc). The dominant peak at 1297.11  $m/z$  is the precursor with neutral loss of the O-Fuc-Glc disaccharide ( $[M+2H-Fuc-Glc]^{++}$ ). Peptide fragments are present at low abundance, identifying the sequence of the unmodified peptide.

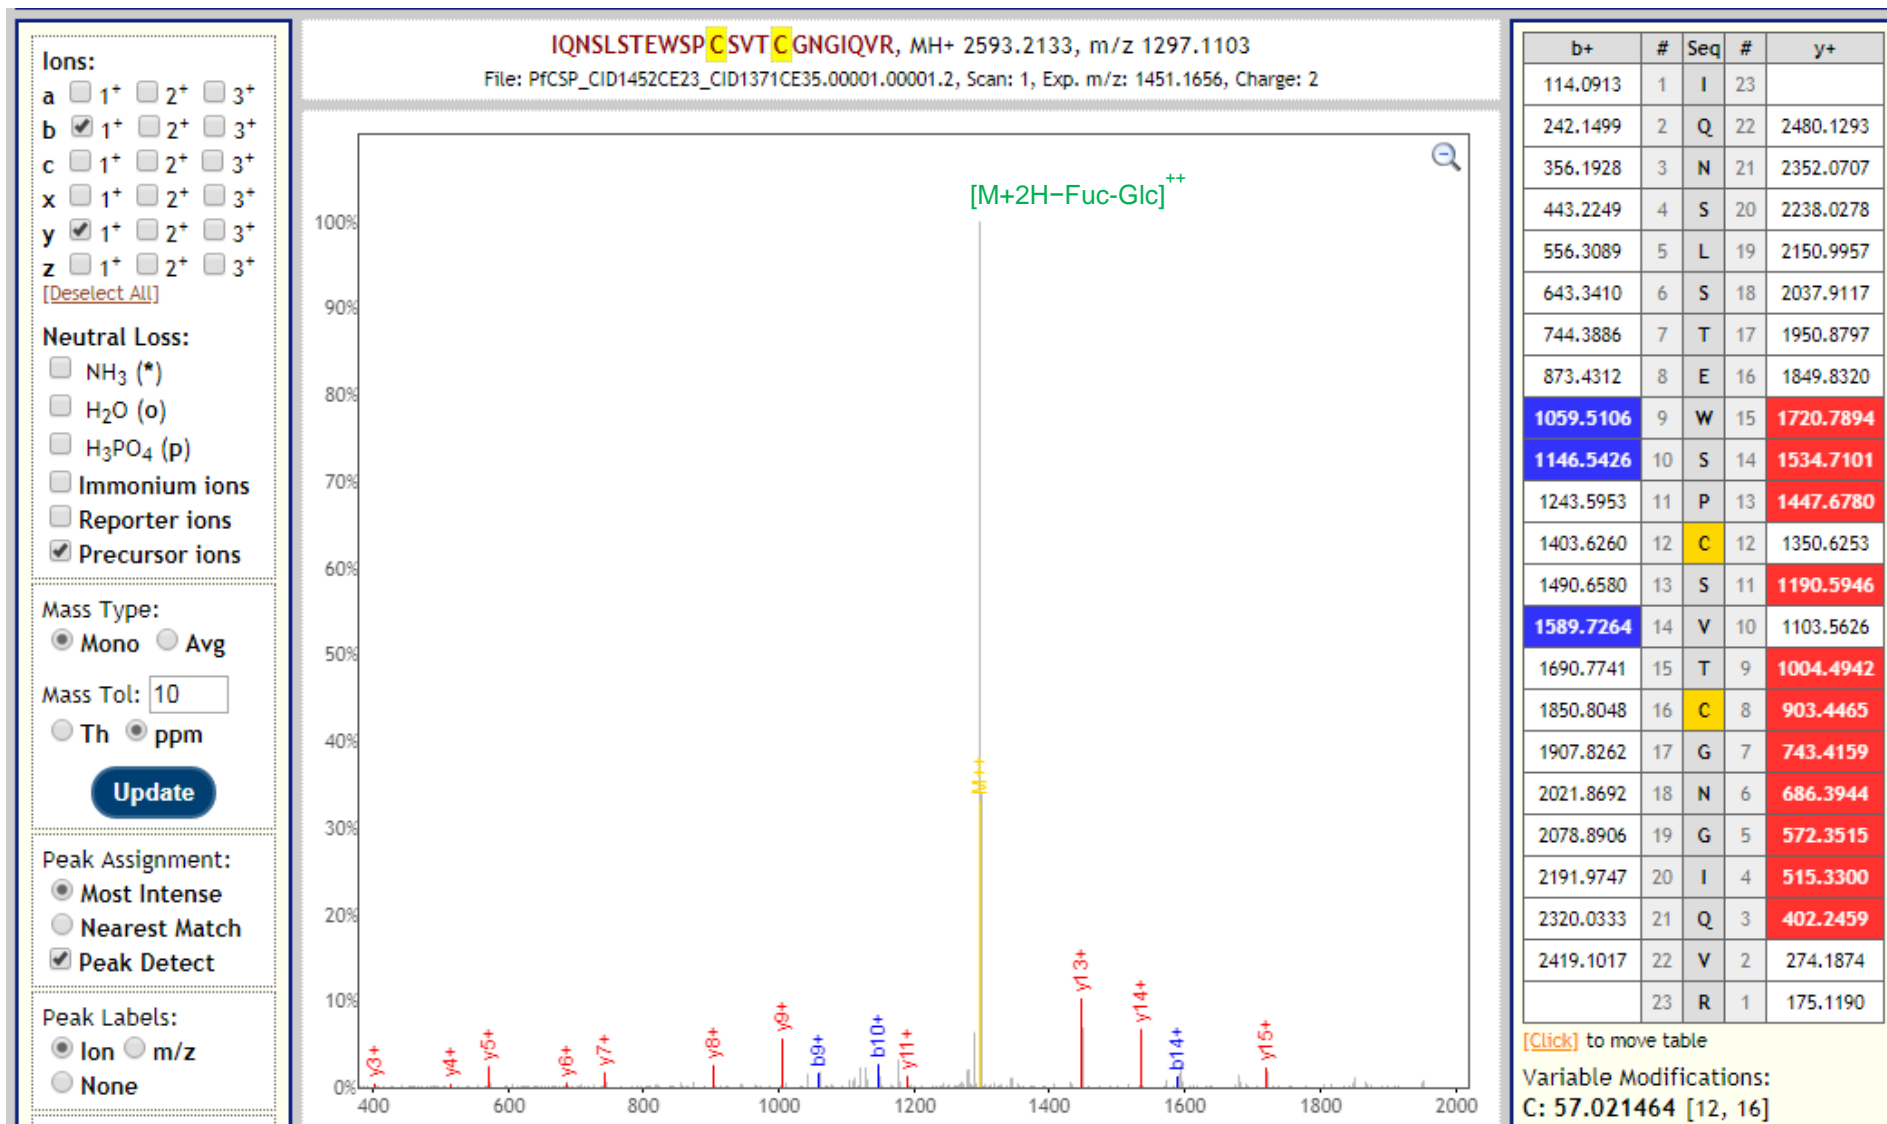

**Figure S1c.** MS<sup>3</sup> (CE = 35 %) of the 1370.14 *m/z* fragment seen in Figure S1b produces a dominant peak at 1297.11 *m/z* matching the mass of the unmodified peptide. Many unmodified peptide fragment peaks confirm the sequence of the peptide. This spectrum confirms that the 1370.14 *m/z* peak seen in Figure S1b arises from neutral loss of Glc from the O-Fuc-Glc dissaccharide.

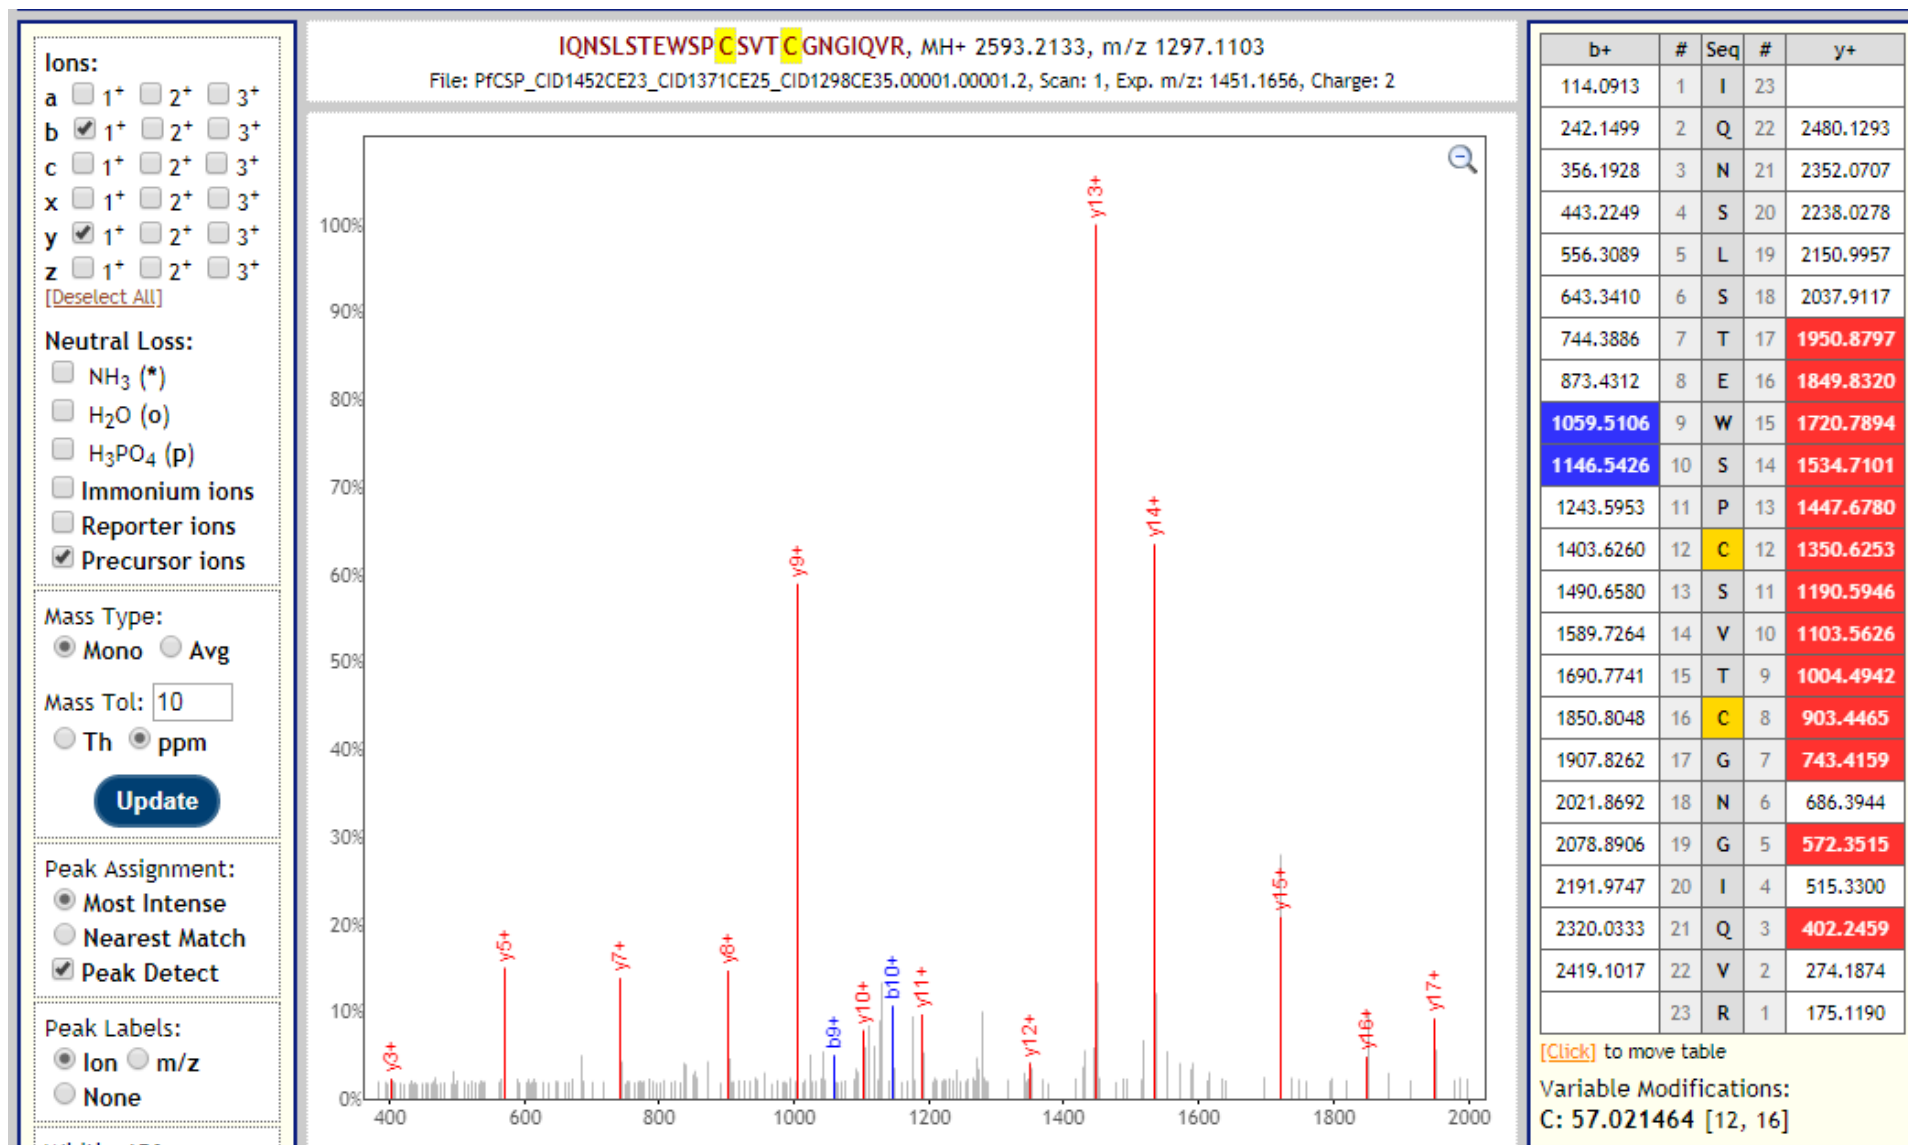

**Figure S1d.** MS<sup>4</sup> of the 1298.11 *m/z* peak seen in Figure S1c (MS<sup>2</sup> CE = 23 %, MS<sup>3</sup> CE = 25 %, MS<sup>4</sup> CE = 35 %). This peak arises from neutral loss of O-Fuc after neutral loss of Glc from the O-Fuc-Glc disaccharide. Fragment ions confirm the sequence of peptide. This spectrum further confirms that the 1370.14 *m/z* peak seen in Figure S1b arises from neutral loss of Glc from the O-Fuc-Glc disaccharide.

**Figure S2. Neutral loss of O-linked and C-linked glycans at increasing collision energies.**

A tryptic digest of recombinant *P. falciparum* thrombospondin related anonymous protein (TRAP) was analyzed by LC-MS/MS with an LTQ-Orbitrap Elite. Precursor ions for the TSR peptide modified with C-Man and O-Fuc-Glc were isolated and fragmented at sequentially increasing normalized collision energies (CE). All spectra are collision-induced dissociation (CID) collected at high resolution in the Orbitrap. Annotated fragment spectra were visualized using a development version of Lorikeet as implemented in the Trans-Proteomic Pipeline.

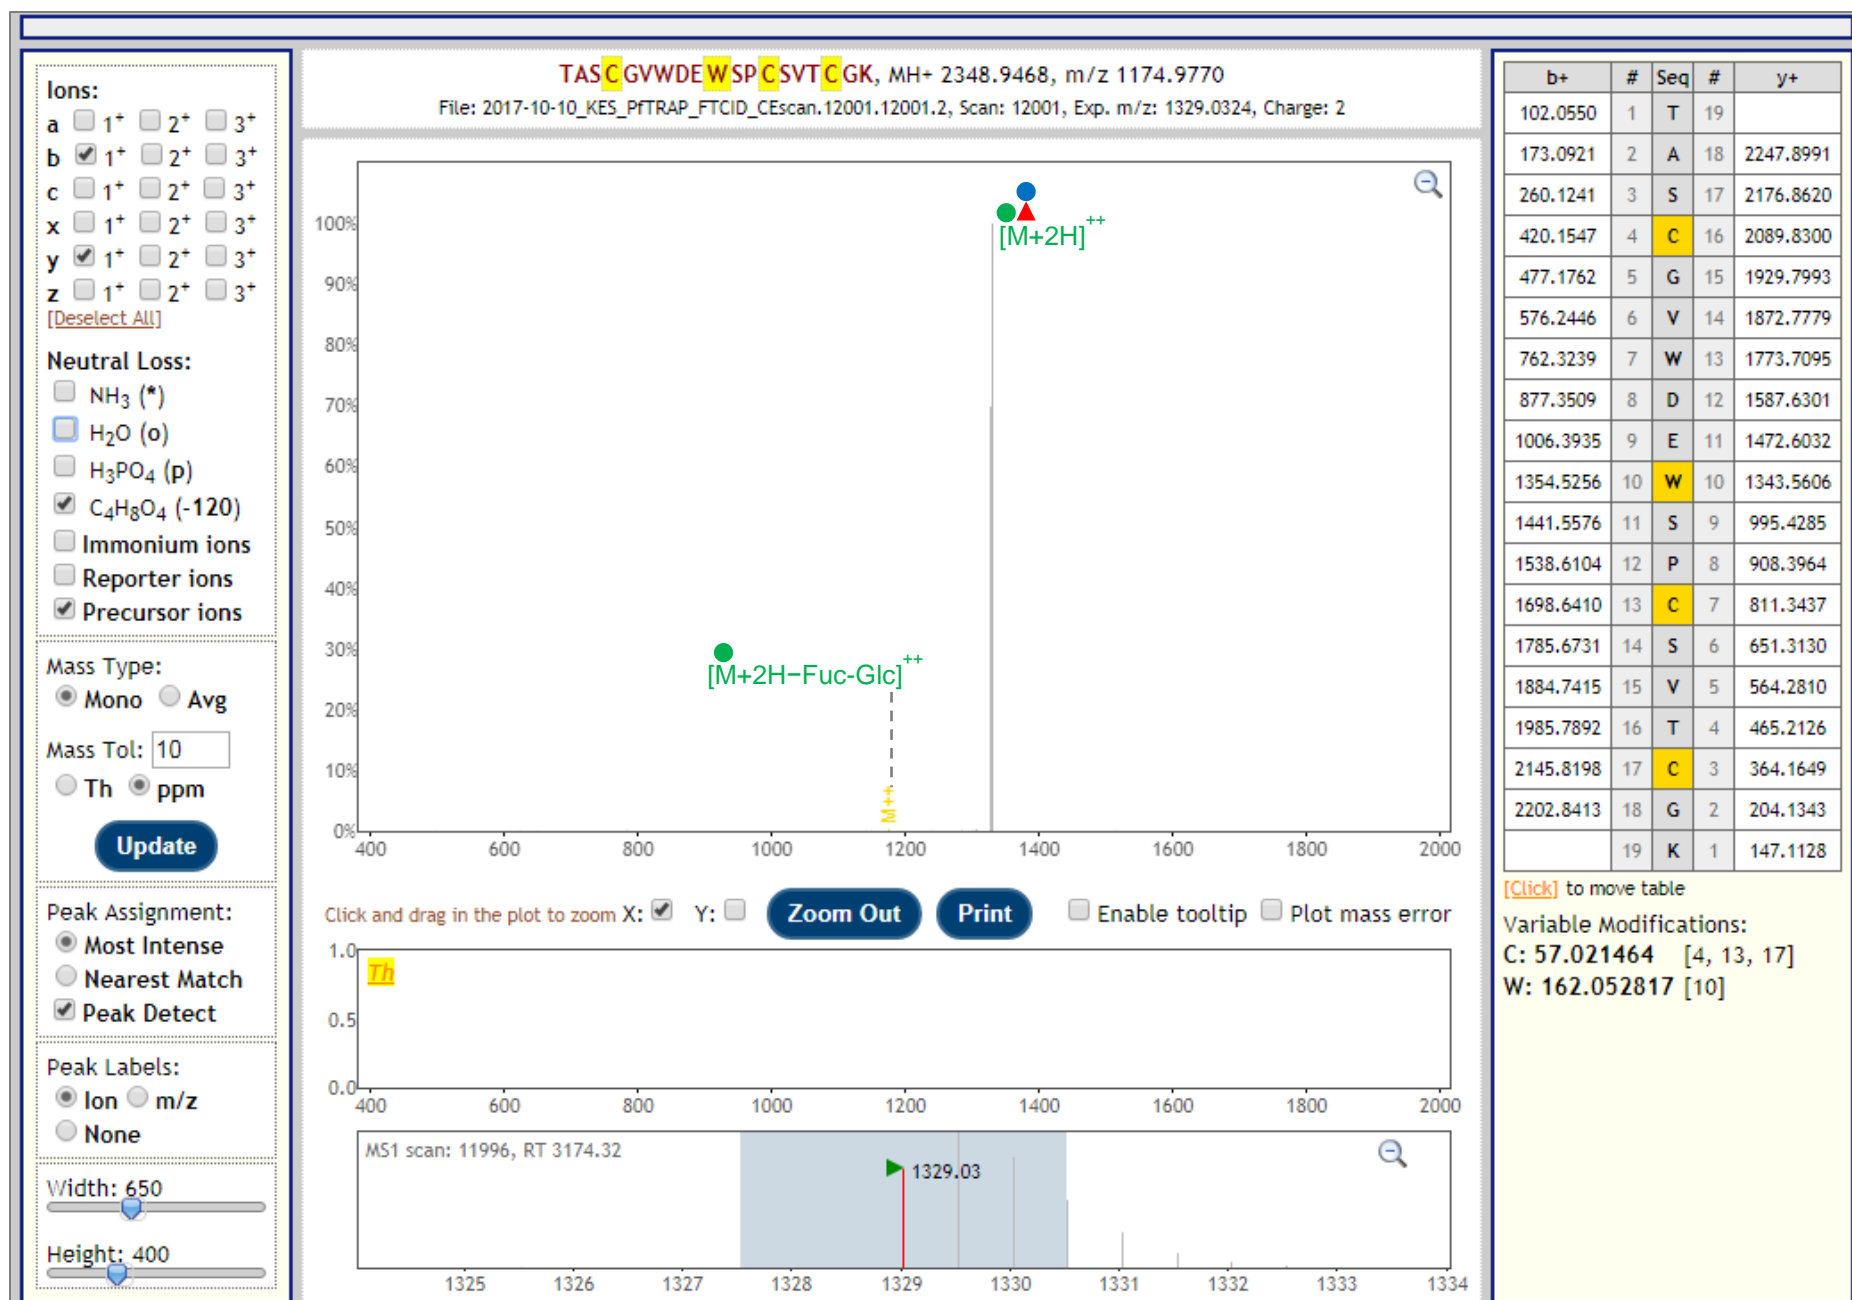

**Figure S2a.** CID at 1329.03 *m/z*, CE = 20 %. The precursor peak is largely unreacted ([M+2H]<sup>++</sup>, green circle = C-Man, red triangle = O-Fuc, blue circle = β1,3-Glc), though a small peak (~0.3% relative abundance) matches the mass of the peptide after neutral loss of the O-linked disaccharide (1174.98 *m/z*, yellow, automatically annotated by Lorikeet as the precursor peak M<sup>++</sup>).



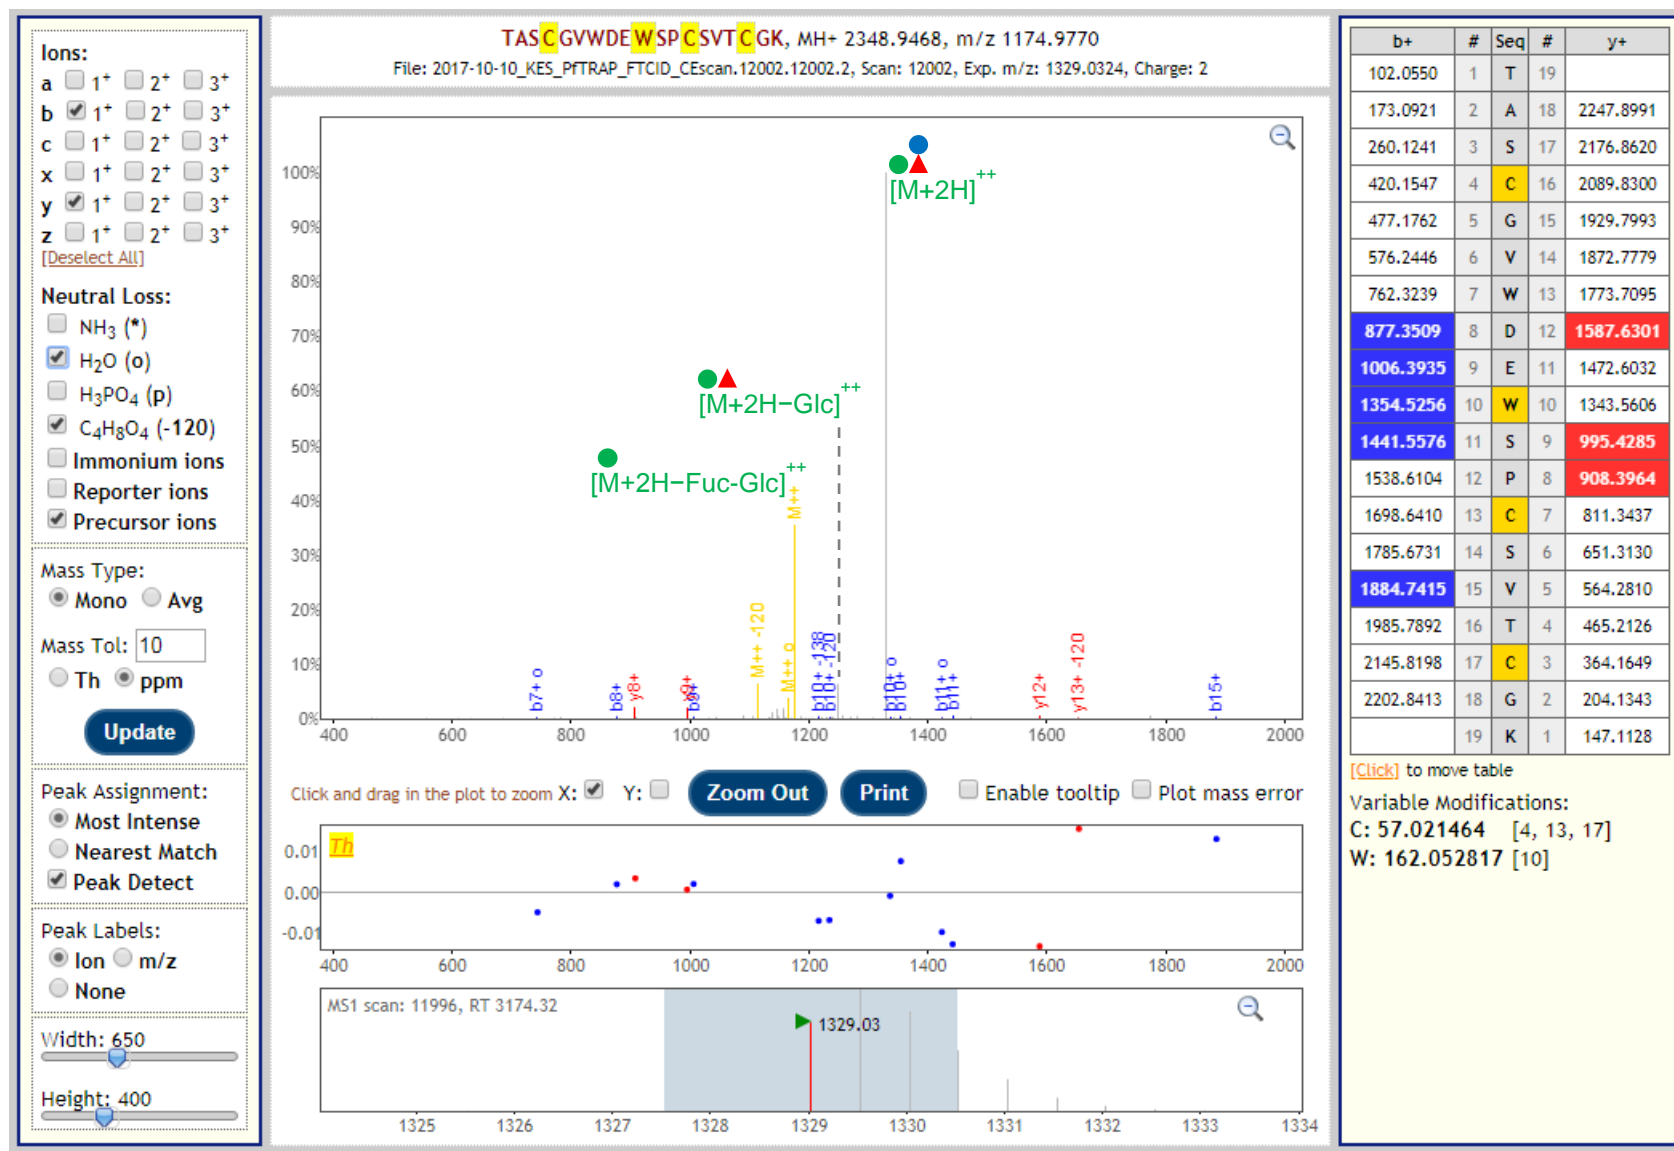

**Figure S2b.** CID at 1329.03 *m/z*, CE = 25 %. The dominant peak is still unreacted precursor ([M+2H]<sup>++</sup>, green circle = C-Man, red triangle = O-Fuc, blue circle = β1,3-Glc). A smaller peak at 1248.01 *m/z* matches the mass of the precursor after neutral loss of Glc from the O-Fuc-Glc disaccharide ([M+2H-Glc]<sup>++</sup>). A third peak at 1174.98 *m/z* (yellow, automatically annotated by Lorikeet as the precursor peak M++) matches the mass of the peptide precursor ion after neutral loss of the O-Fuc-Glc disaccharide ([M+2H-Fuc-Glc]<sup>++</sup>). Note that peptide fragment ions appearing at this CE identify the sequence of the peptide with C-Man intact, positively localizing the glycan to the C-terminal Trp residue. Neutral loss of 120.04 Da from cross-ring cleavage is seen on the precursor and fragment peaks.

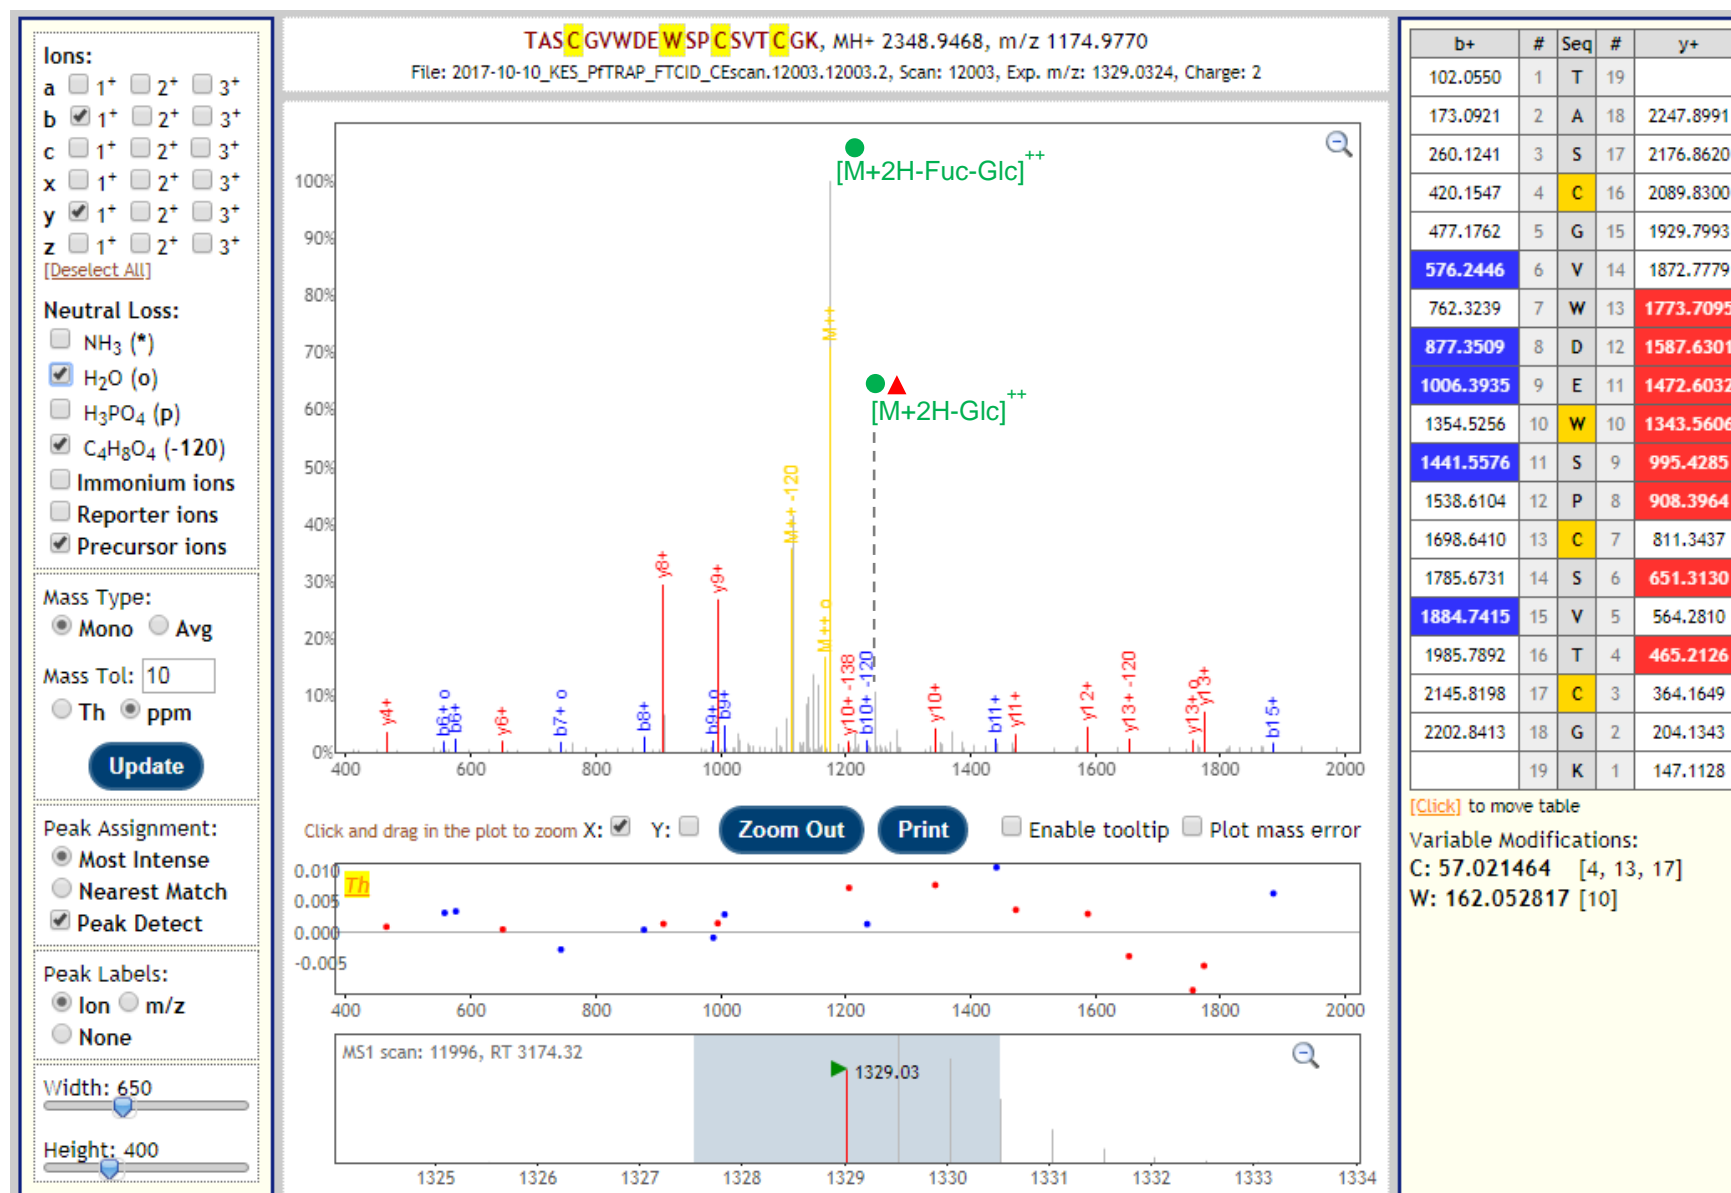

**Figure S2c.** CID at 1329.03 *m/z*, CE = 30 %. At this CE all parent precursor ion has been fragmented. The small peak at 1248.01 *m/z* remains, the mass of the precursor after neutral loss of Glc from the O-Fuc-Glc disaccharide ([M+2H-Glc]<sup>++</sup>). The dominant peak is now 1174.98 *m/z* (yellow M<sup>++</sup>), the peptide precursor ion after neutral loss of the O-Fuc-Glc disaccharide ([M+2H-Fuc-Glc]<sup>++</sup>). Further peptide fragment ions confidently identify the sequence of the peptide with C-Man intact.

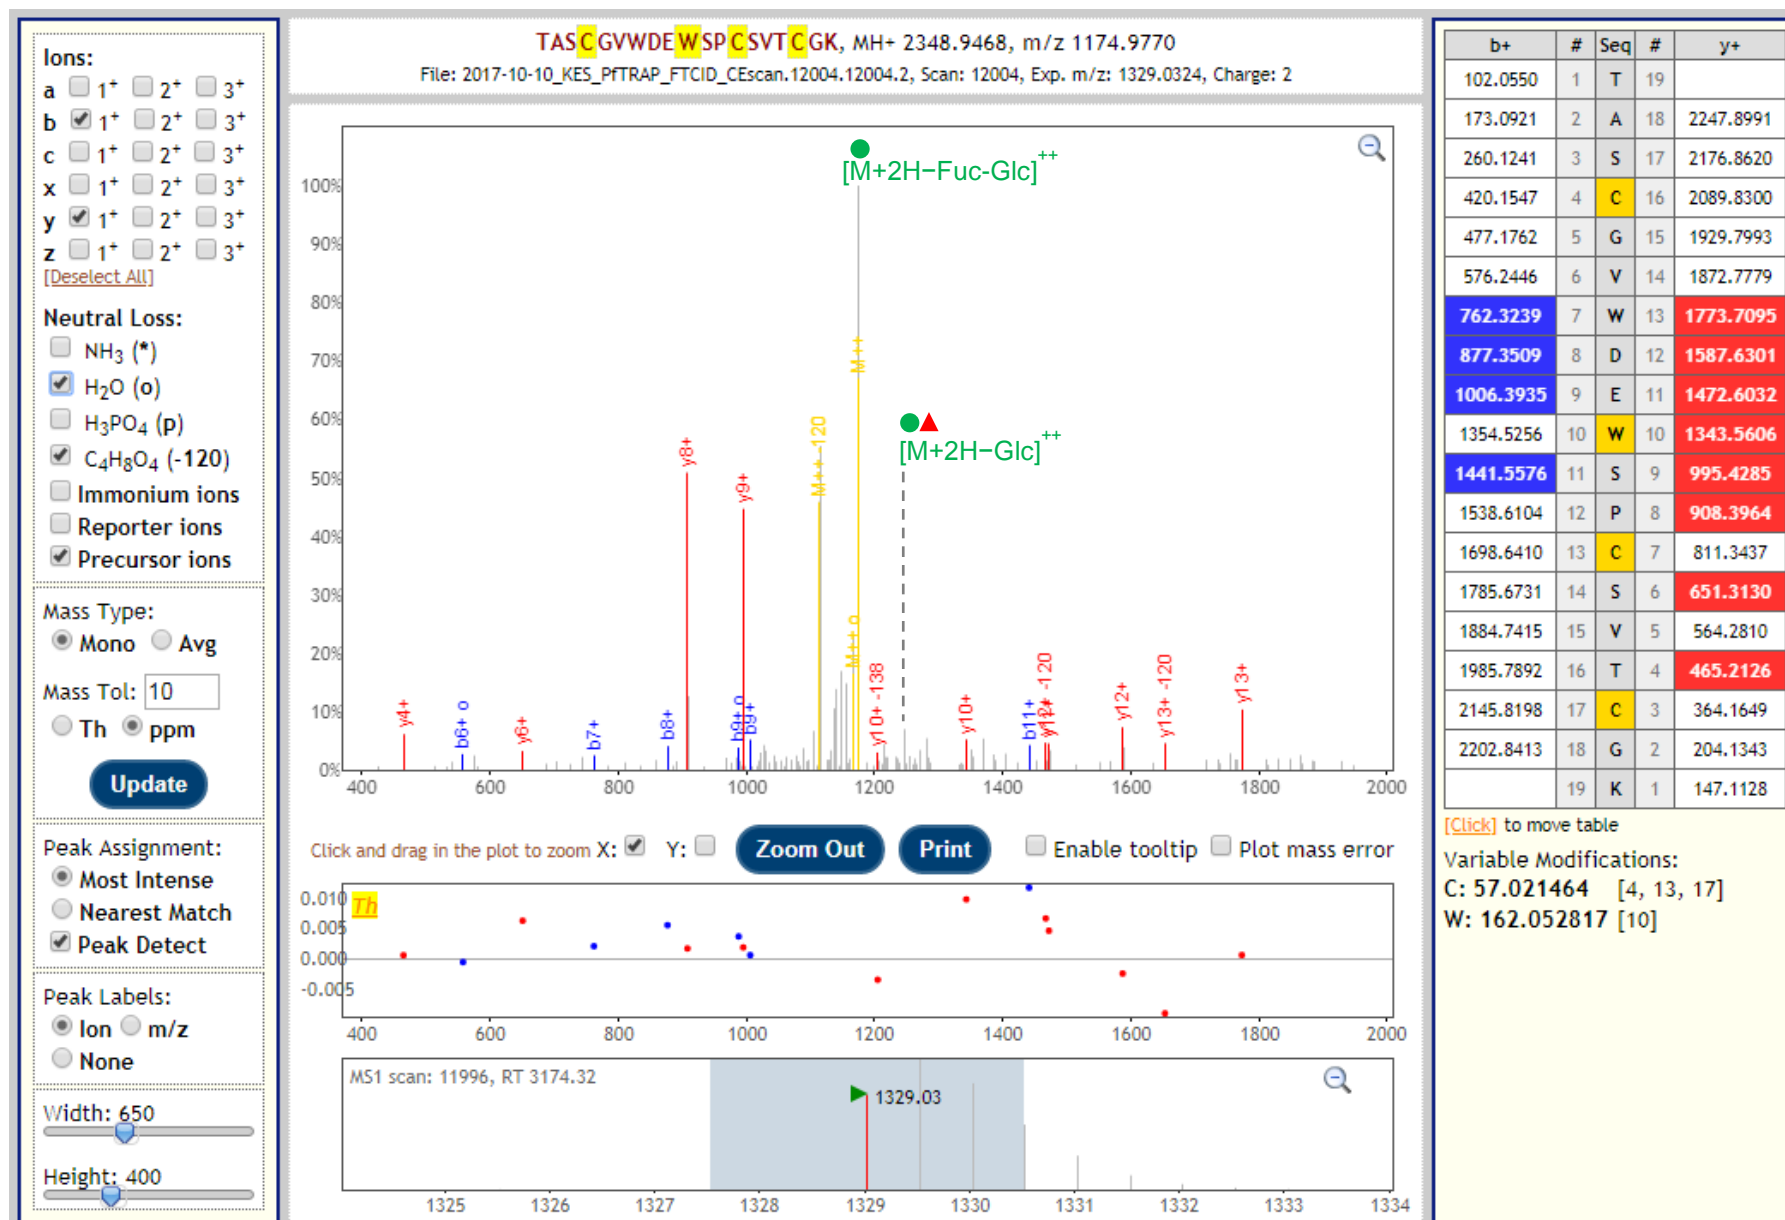

**Figure S2d.** CID at 1329.03 *m/z*, CE = 35 %. This is the CE typically used in shotgun proteomics methods. The C-mannosylated peptide precursor lacking the O-linked glycan remains the dominant peak, but peptide fragment ions are abundant enough to confidently sequence the peptide. Unlike the recombinant *PfCSP* spectra in Figure 1 and supplemental Figure S1b, no peptide fragment ions with the O-linked glycan intact are visible at any CE. This is likely a signal-to-noise issue; the spectra in Figure 1 and Figure S1 were acquired by direct infusion of the peptide, allowing signal and ion fill time to be maximized, whereas these spectra were acquired on-the-fly by LC-MS/MS.

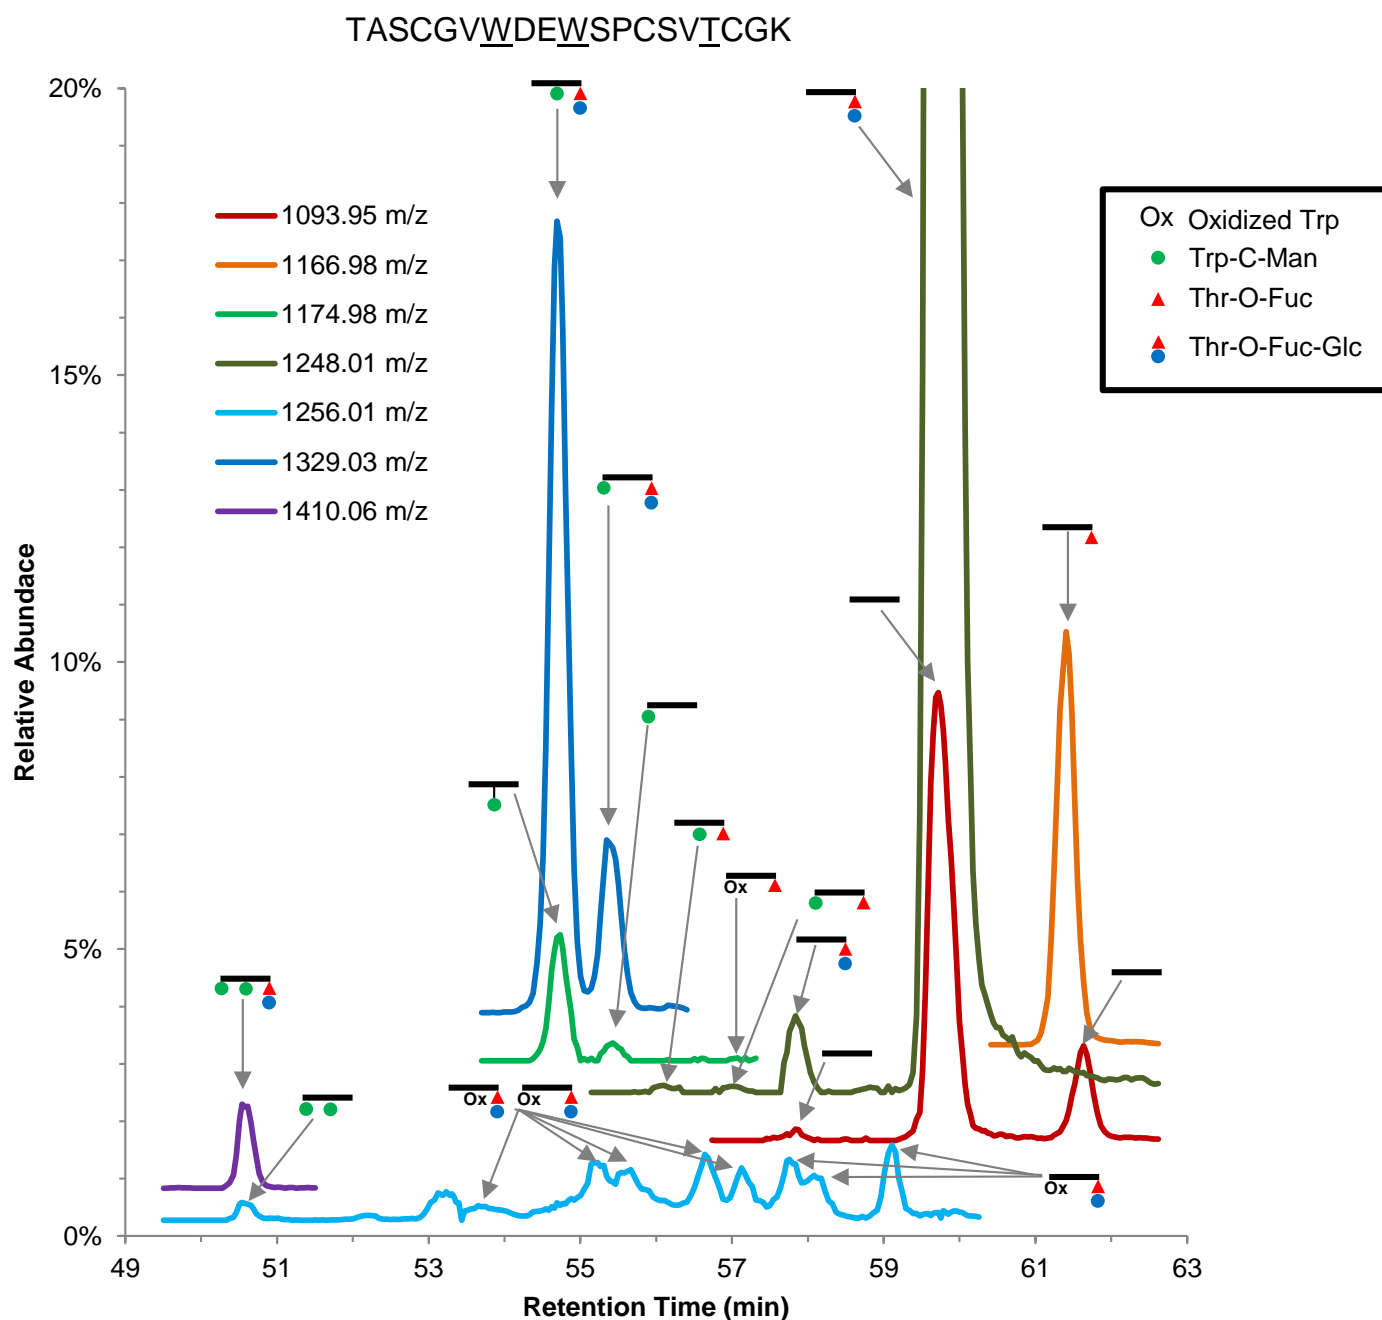

**Figure S3. Glycoforms identified by automated sequence database search of data from LC-MS/MS analysis of recombinant *P. falciparum* TRAP.** The variably C-mannosylated or oxidized Trp residues and the variably O-fucosylated Thr are underlined. Traces are offset for clarity. Peaks indicated with arrows were positively identified by PSMs. Both positional isoforms of the oxidized peptide were identified at several co-eluting retention times. See table S2.

**Figure S4.** Indistinguishable isobaric glycopeptides from recombinant *P. falciparum* TRAP.

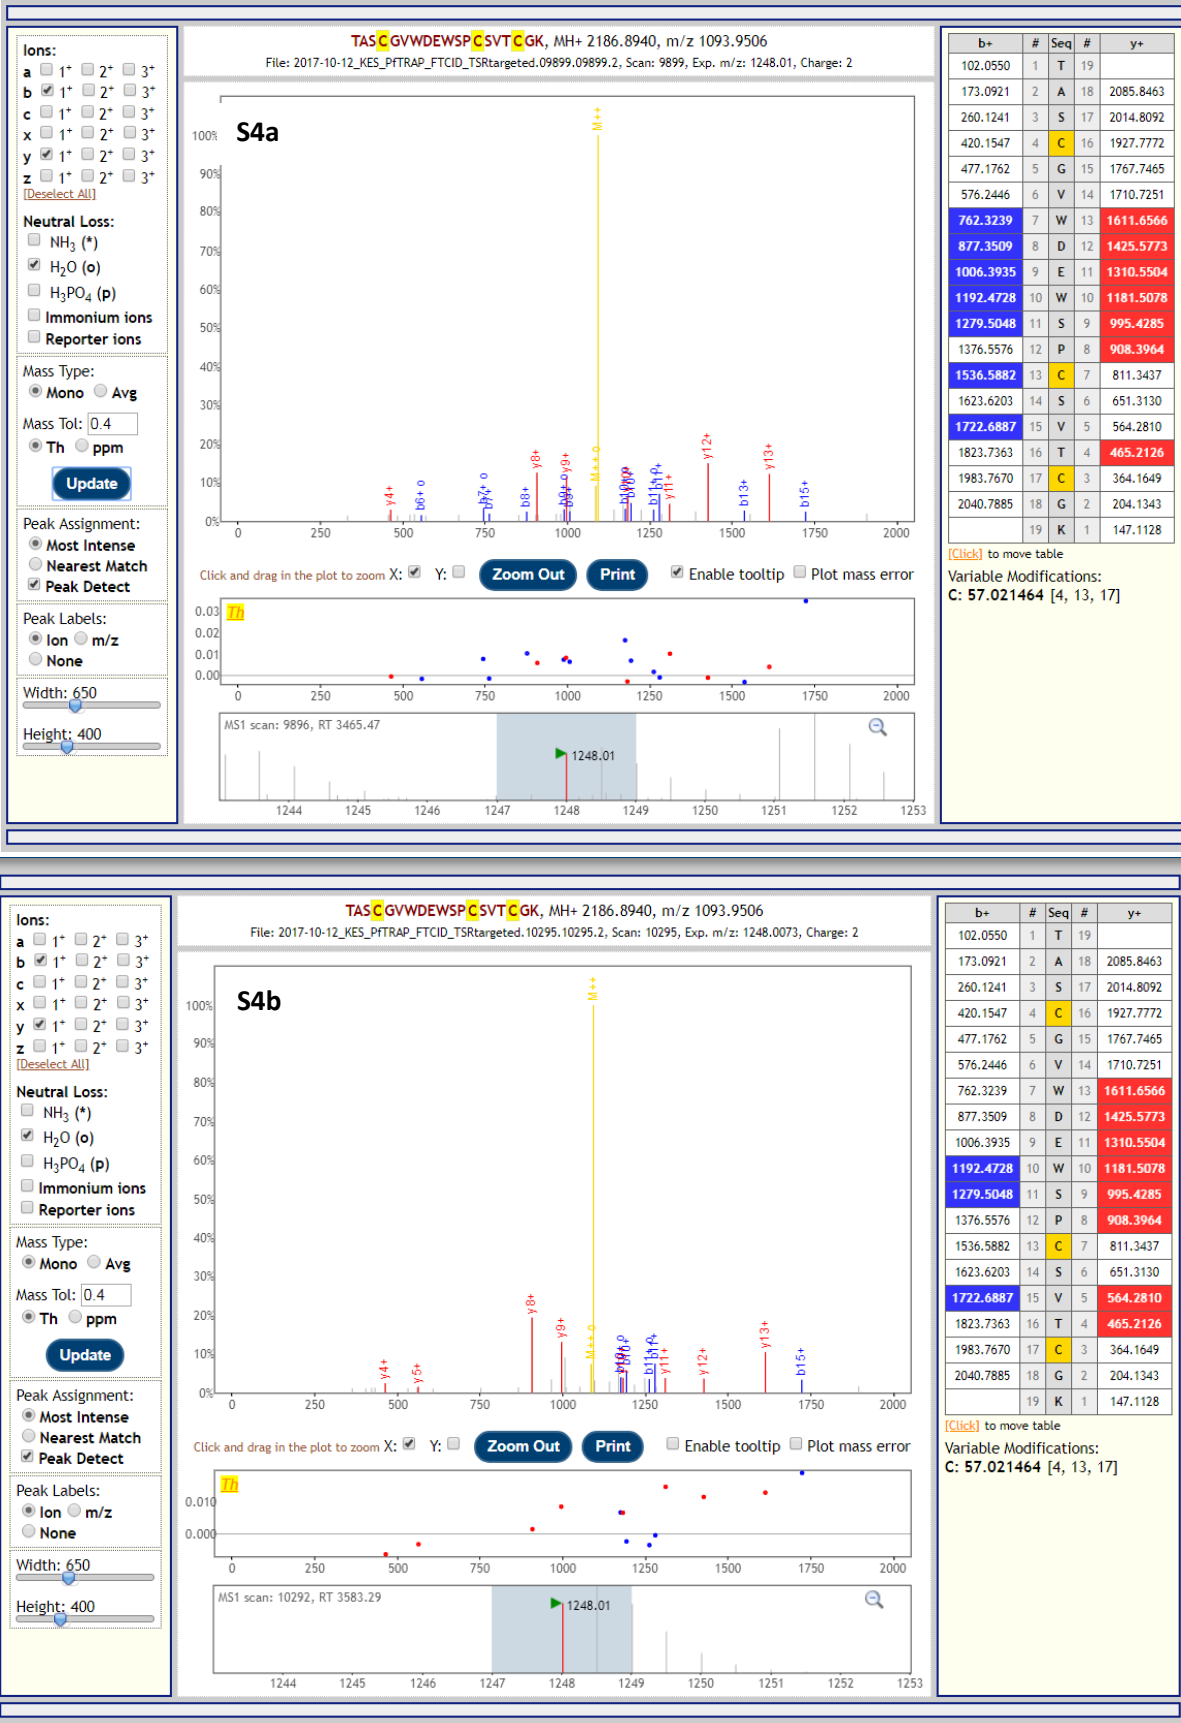

**Figure S4a,b.** Representative MS<sup>2</sup> of the two 1248.01 m/z peaks eluting at a) 57.8 min and b) 58.9 min. The MS<sup>2</sup> from both species appear to identify the same species, i.e. the peptide modified with a gas-phase-labile moiety having a mass matching that of O-Fuc-Glc. The dominant species of the MS<sup>2</sup> spectra, 1093.95 m/z, matches the mass of the unmodified peptide. Additional PSMs are listed in Table S2.

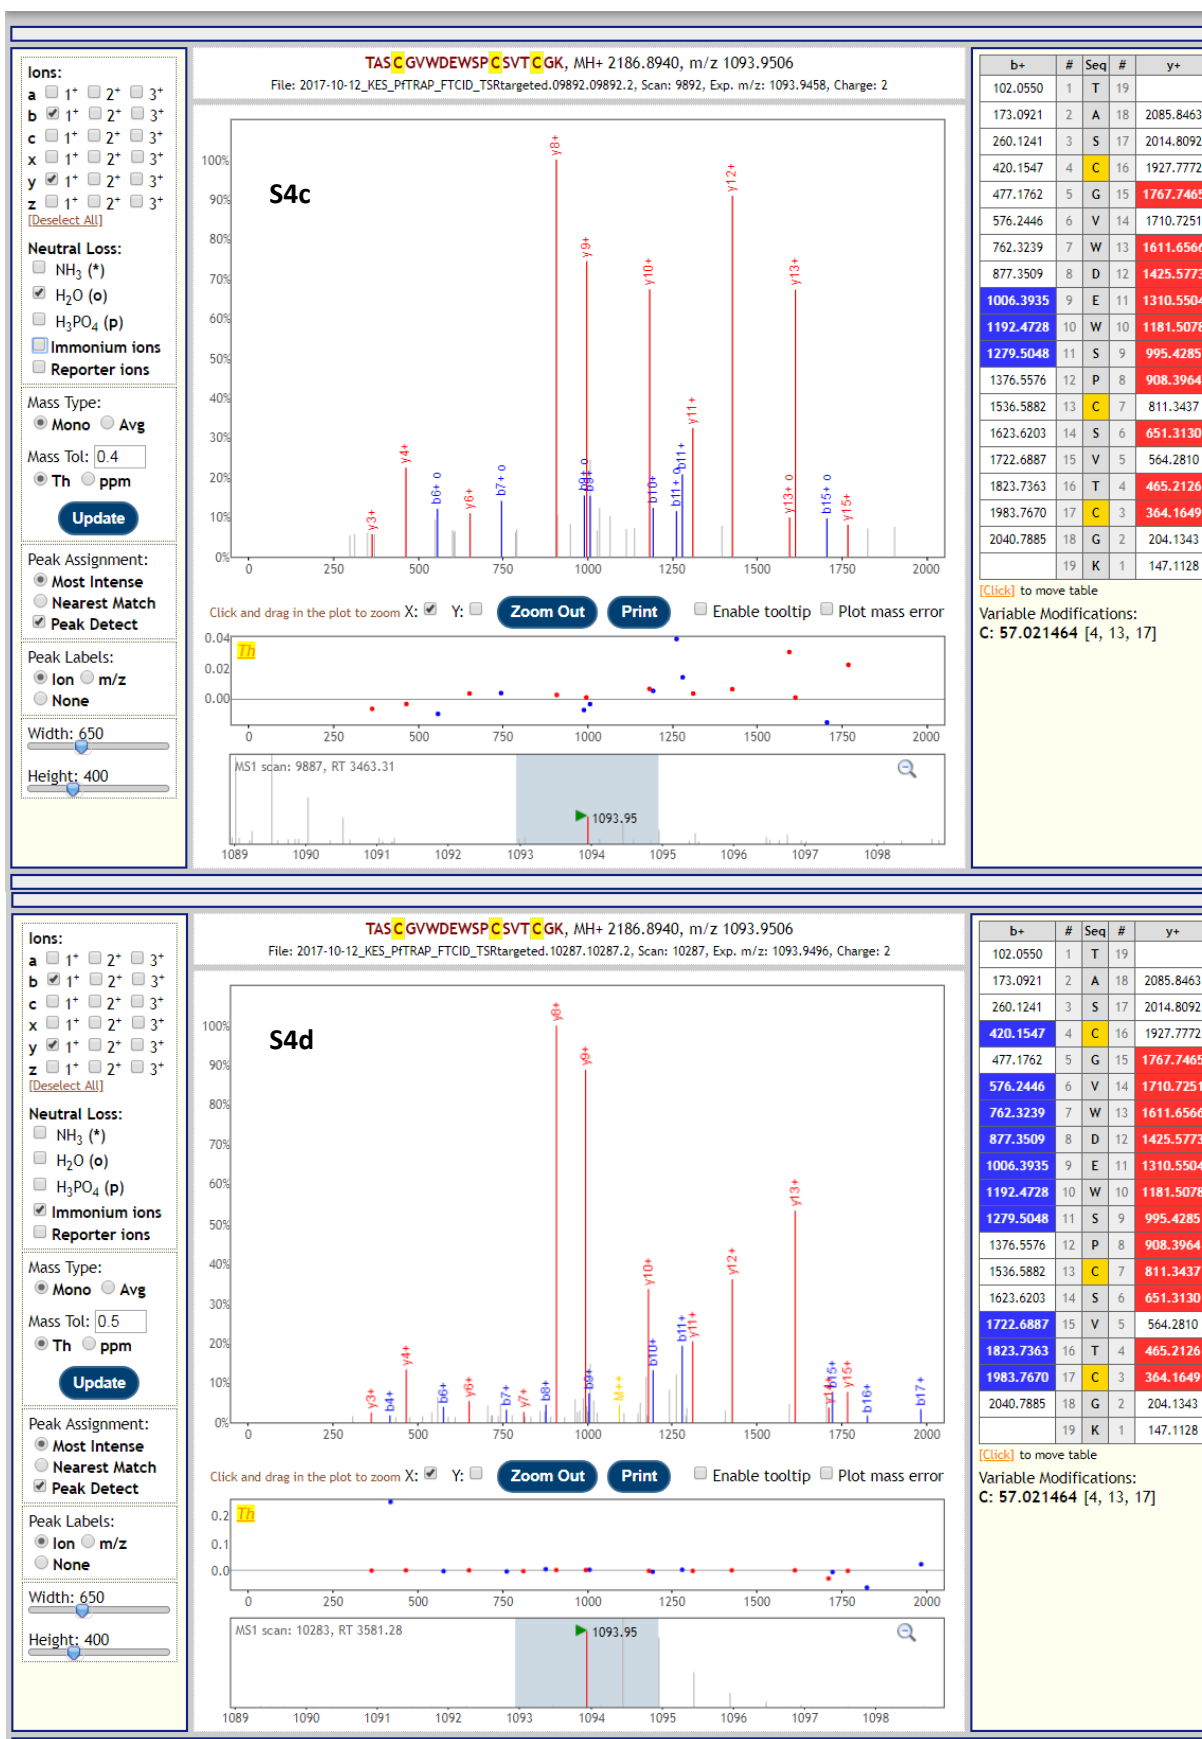

**Figure S4c,d.** Representative MS<sup>2</sup> of the two 1093.5 *m/z* peaks eluting at **c)** 57.8 min and **d)** 58.9 min. The MS<sup>2</sup> from both species appear to identify the unmodified peptide. Both species co-elute with the 1248.01 *m/z* species identified in Fig. S4a and b, consistent with loss of the gas-phase-labile O-Fuc-Glc from in-source fragmentation. Additional PSMs are listed in Table S2.

# **S5. Misidentification of a glycoform in LC-MS/MS of recombinant *P. falciparum* TRAP**

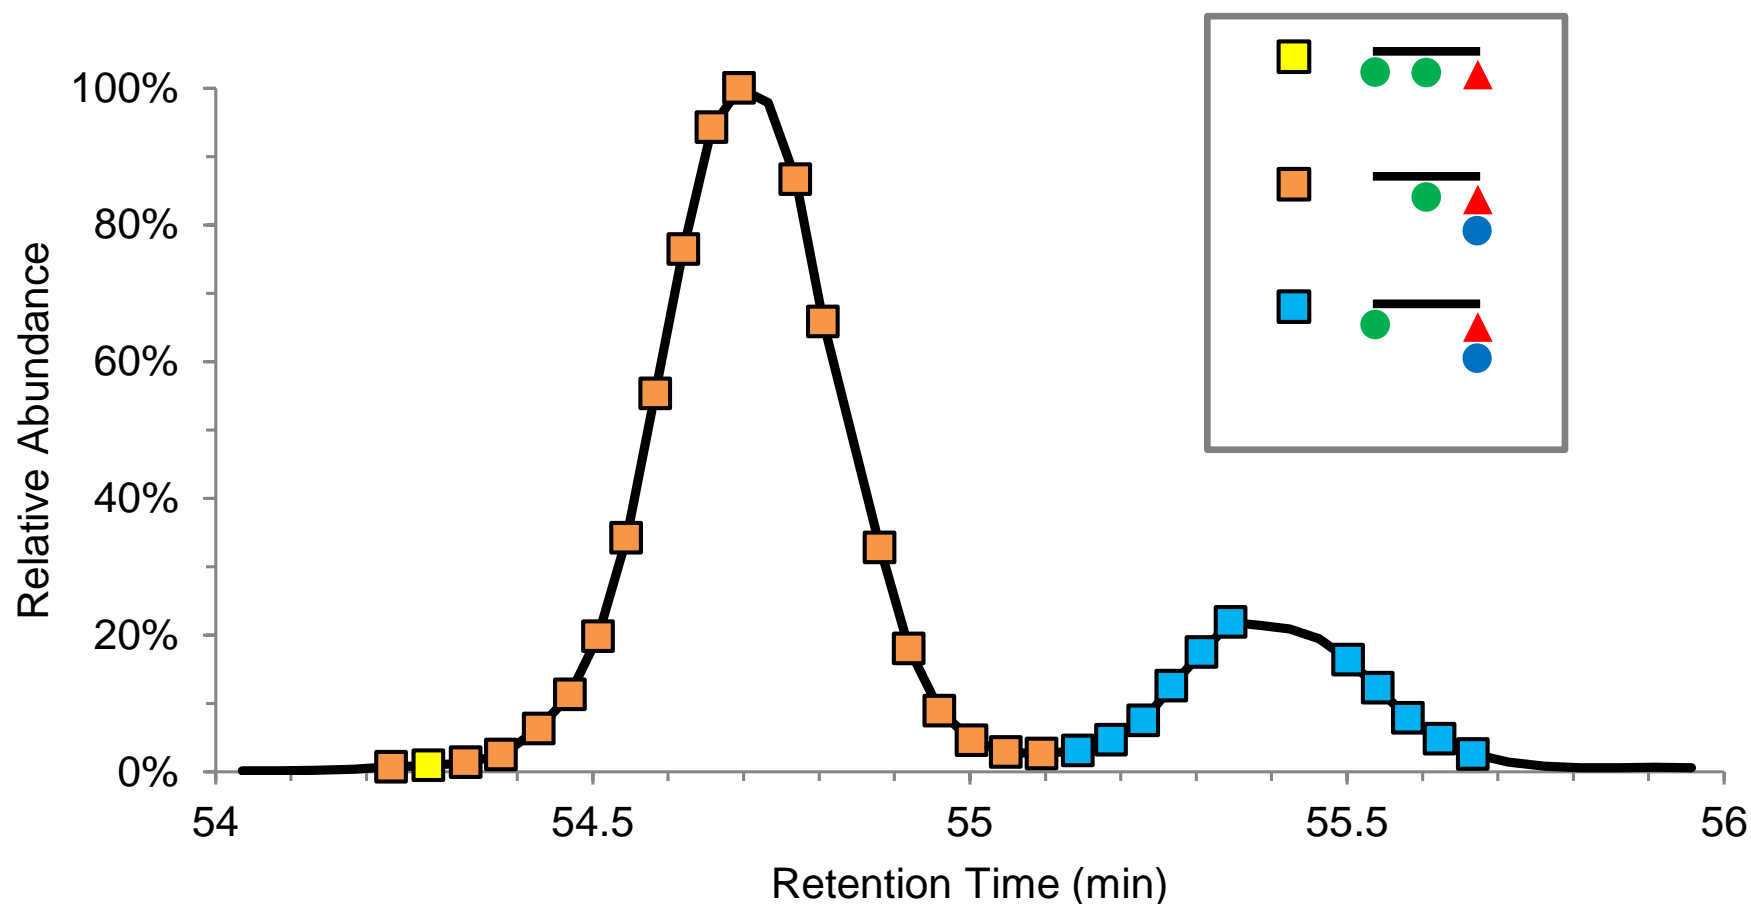

**Figure S5a. Extracted Ion Chromatogram (XIC) of the precursor ion matching multiple isobaric glycoforms.** The XIC of 1329.03  $m/z$  (black line) is overlaid with squares showing points where MS<sup>2</sup> resulted in high-quality peptide spectrum matches (PSMs) identifying glycoforms of the recombinant *Pf*TRAP TSR peptide TASC<sub>1</sub>GVDEWSPCSVT<sub>2</sub>CGK modified with combinations of C-linked mannose at tryptophan (green circle), O-linked fucose at the C-terminal threonine (red triangle) and  $\beta$ 1,3-linked glucose (blue circle) added to the fucose. See Table S2.



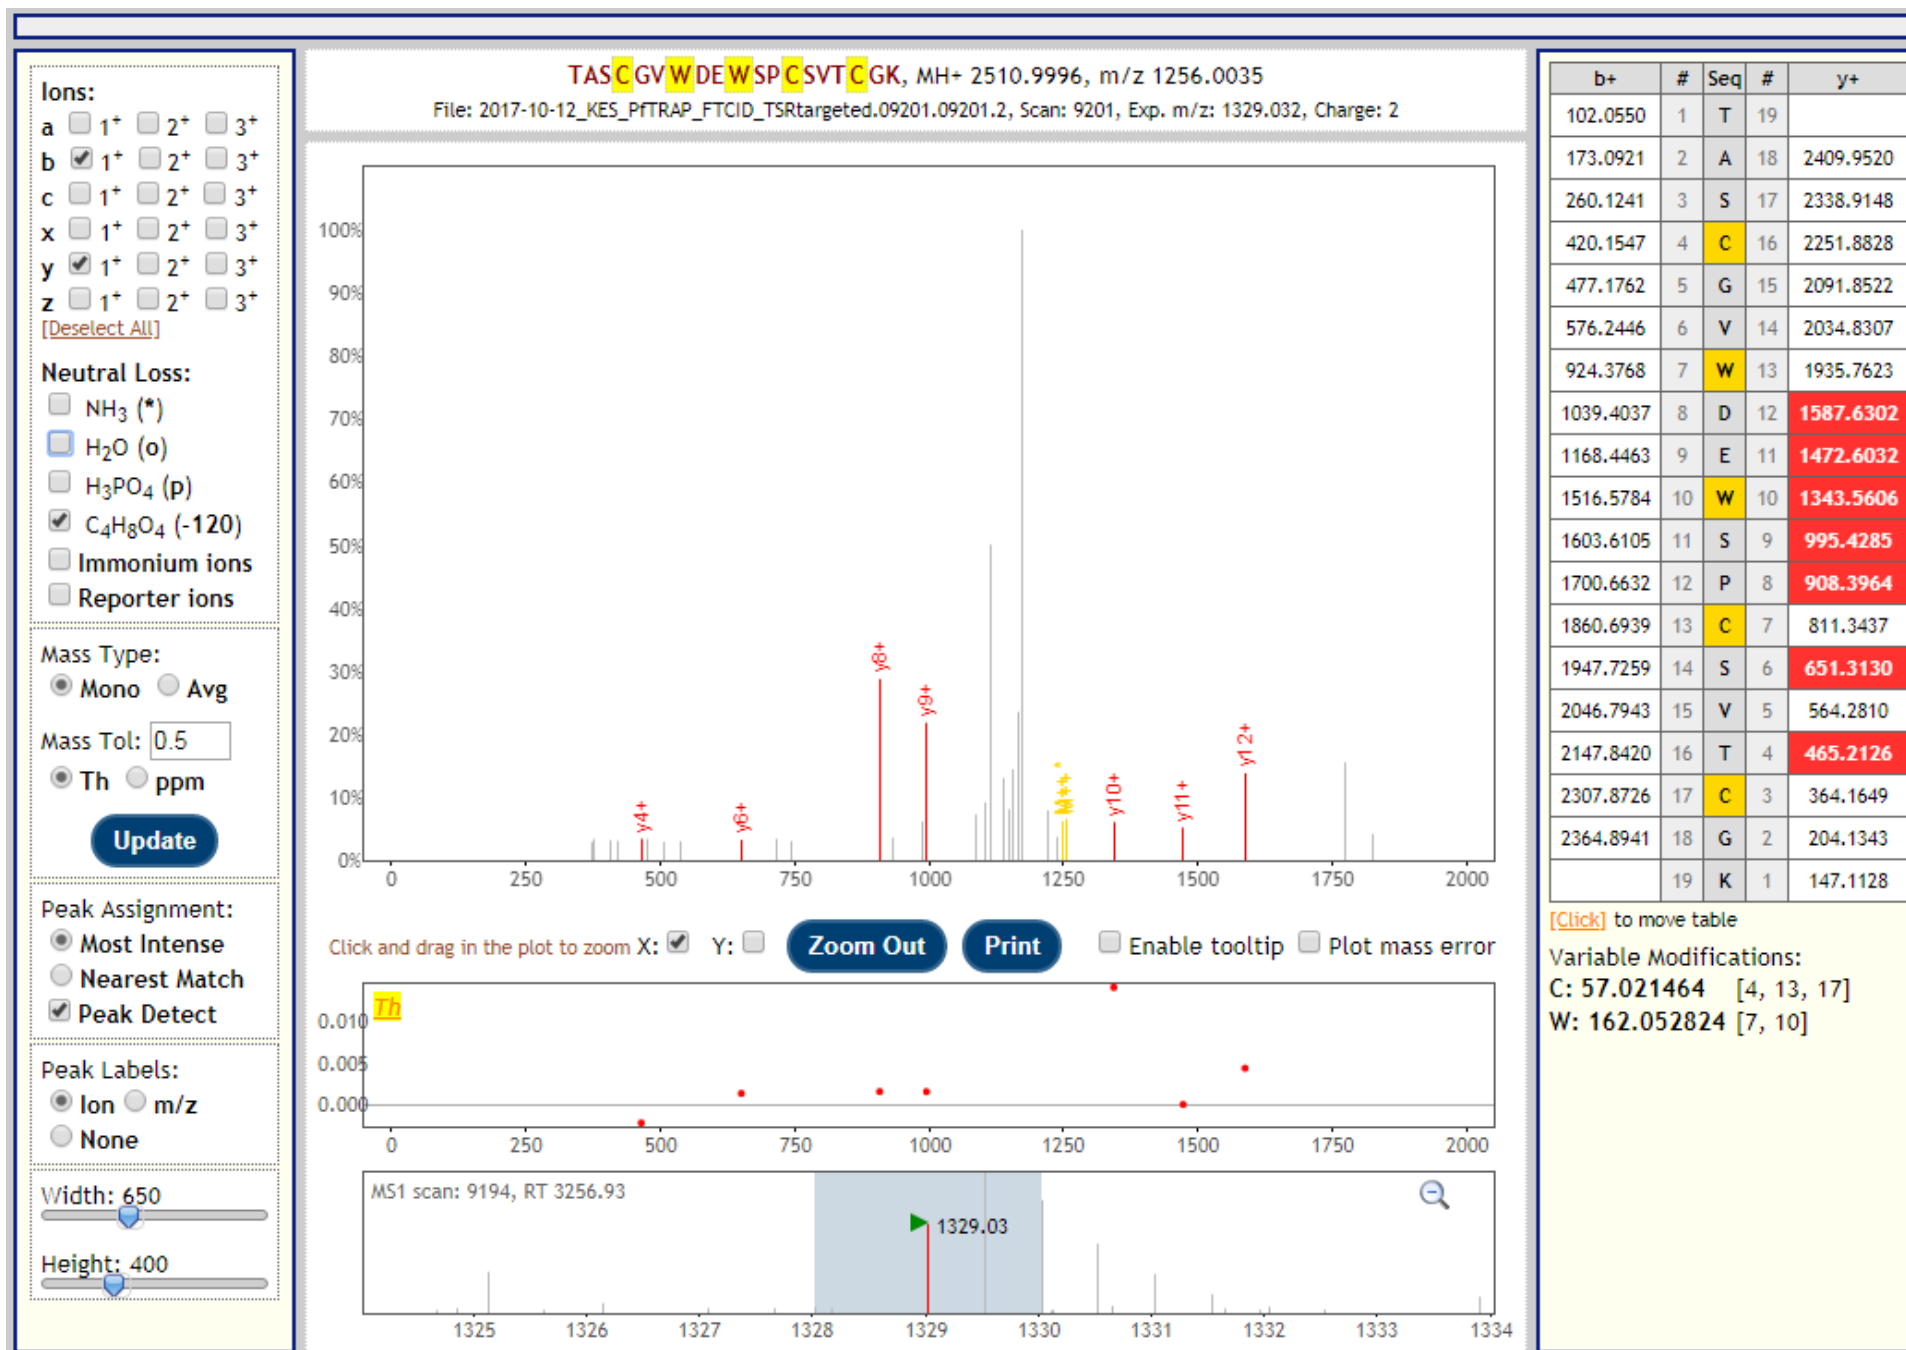

**Figure S5b** A single PSM (the yellow square in Figure S5a) was incorrectly identified as the glycoform of the peptide featuring double mannosylation and an O-Fuc, with the MS<sup>2</sup> annotated as shown here.



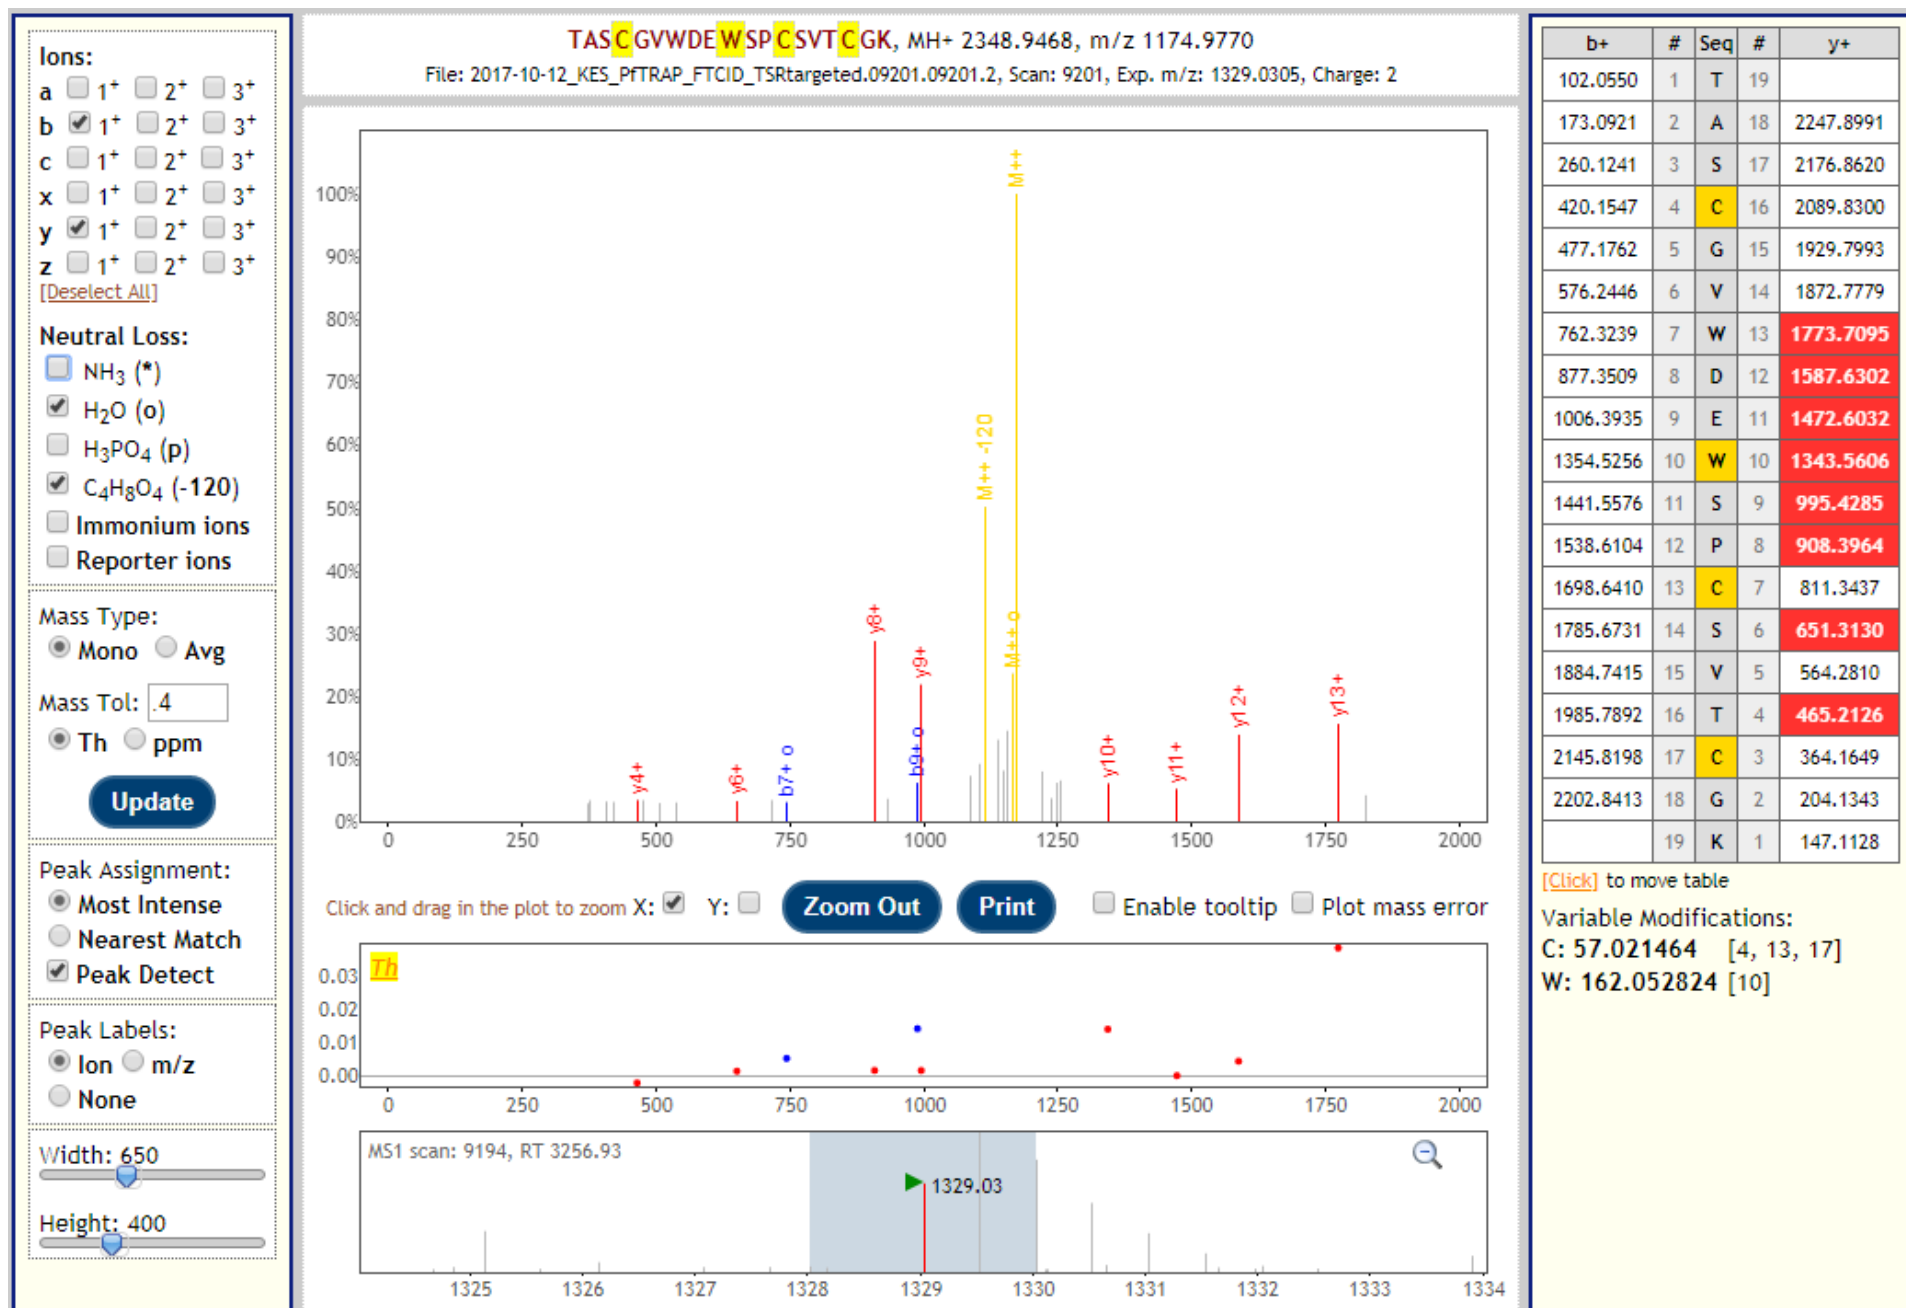

**Figure S5c** The same MS<sup>2</sup> from Figure S5b, re-annotated with the correct glycoform. While most of the fragment ions are the same as for the incorrect annotation (except y<sub>13</sub>), the precursor fragment exhibiting neutral loss of O-Fuc-Glc (the yellow M<sup>++</sup> peak) as well as cross-ring cleavage of C-man (yellow M<sup>++</sup>-120 peak) confirm that this is the correct annotation.

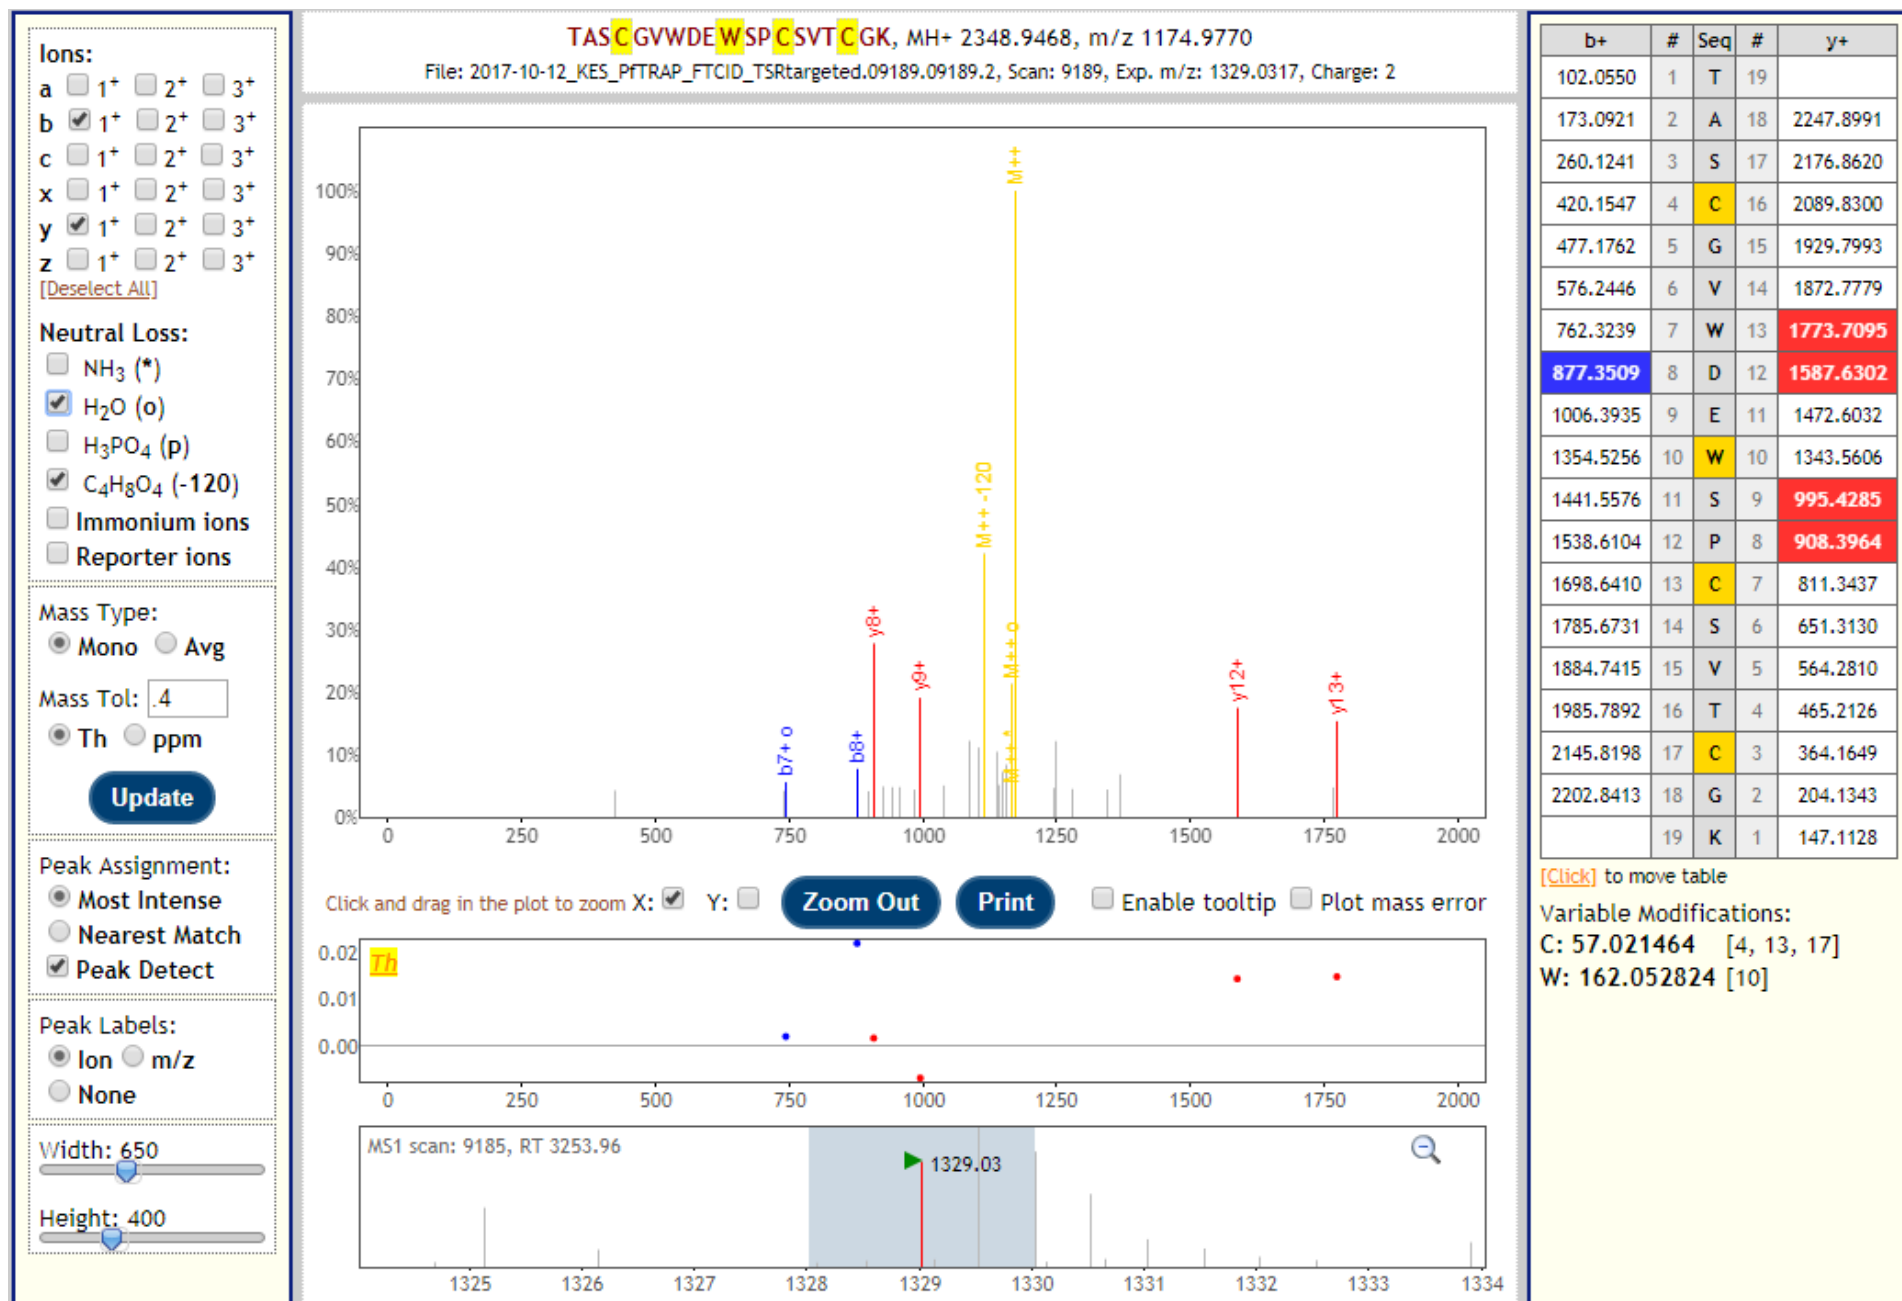

**Figure S5d.** The MS<sup>2</sup> for the same parent ion that immediately precedes the incorrect PSM, though sparse, identifies the correct glycoform.

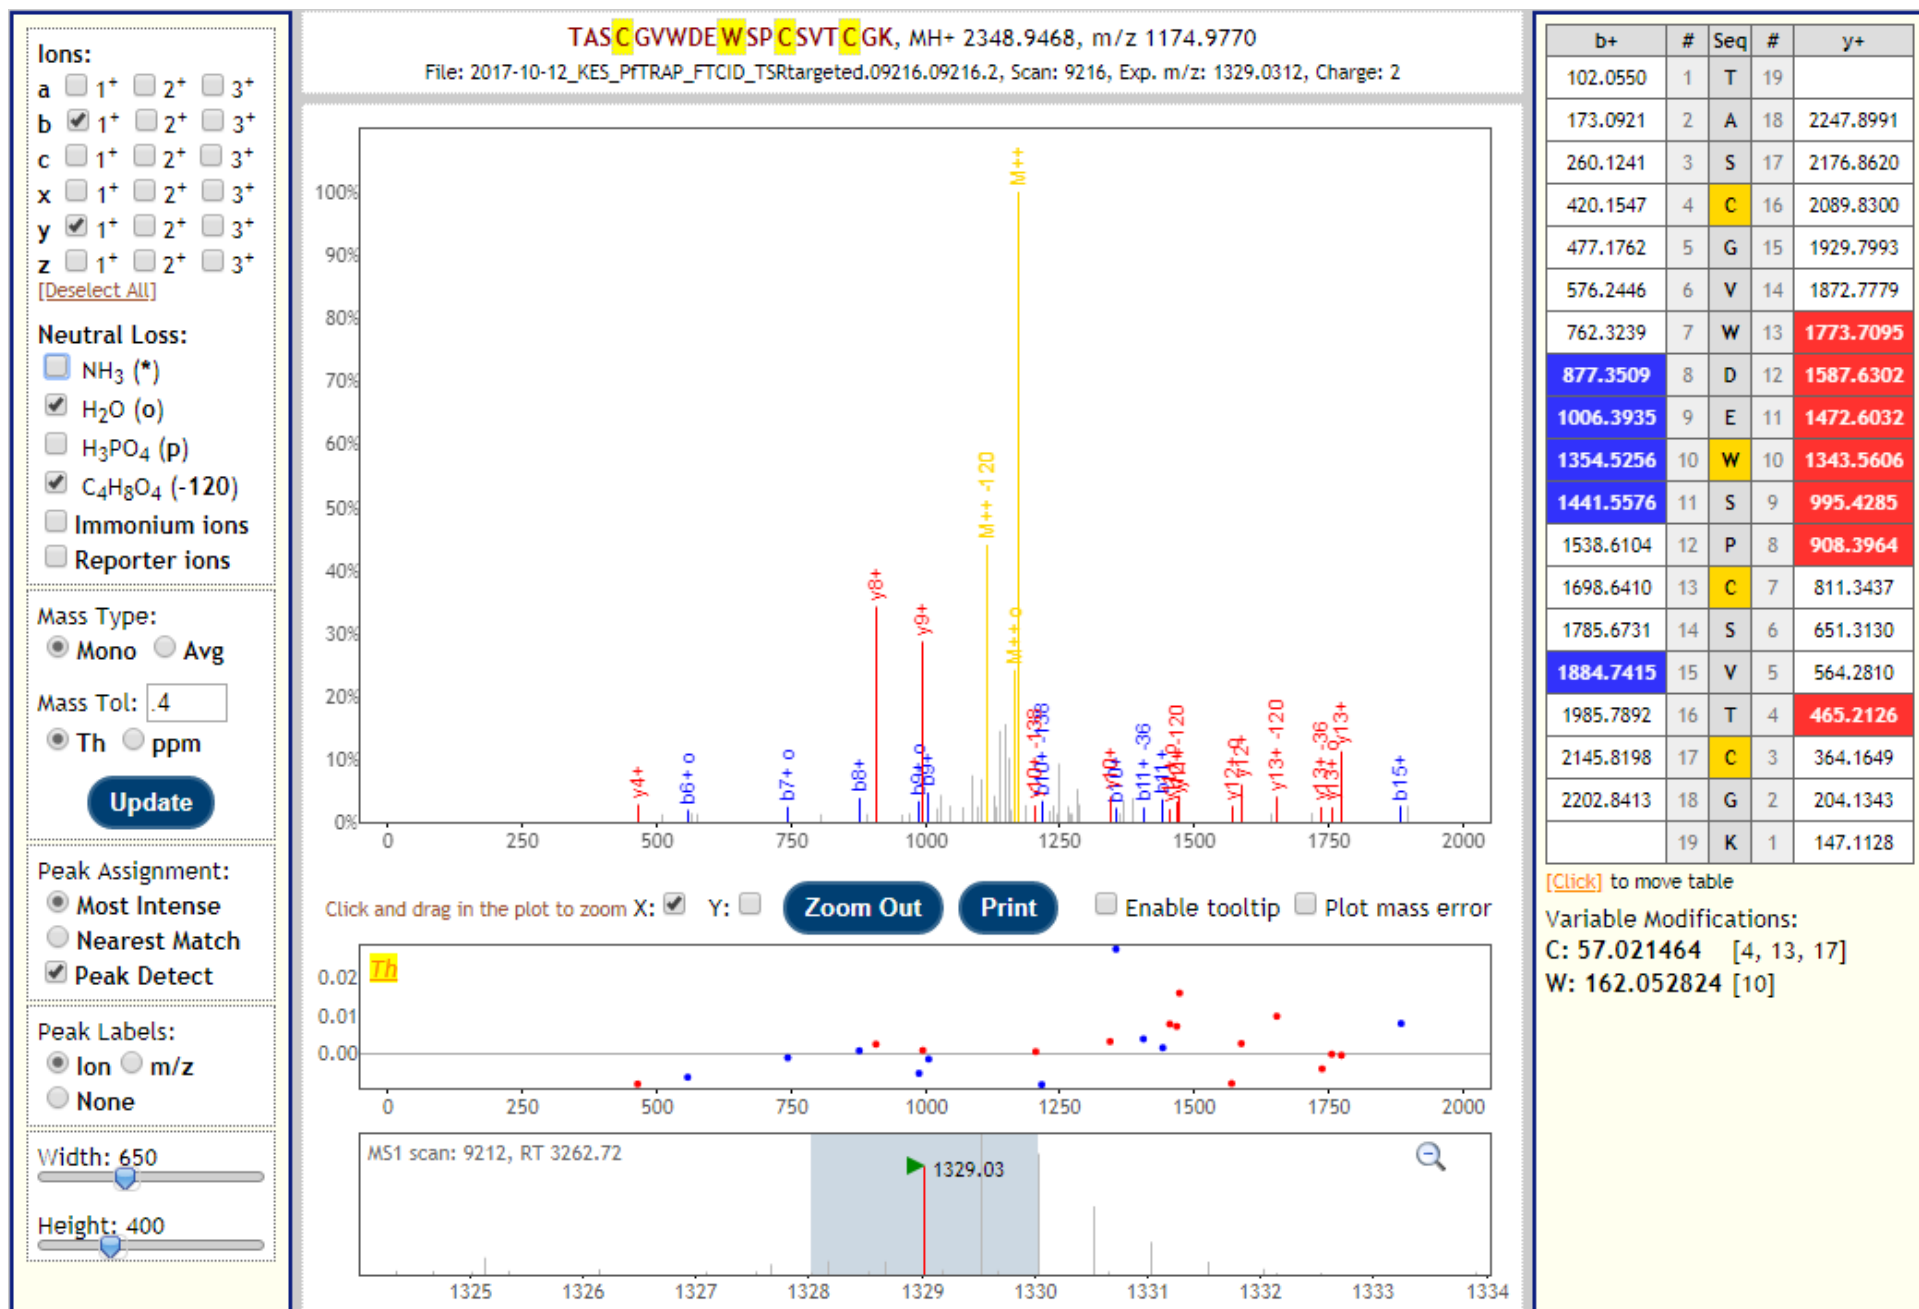

**Figure S5e.** The MS<sup>2</sup> for the same parent ion immediately following the incorrect PSM identifies the correct glycoform, as do the remaining PSMs for the parent ion in the same chromatographic peak.

IQNSLSTEWSPCSVICGNGIQVR

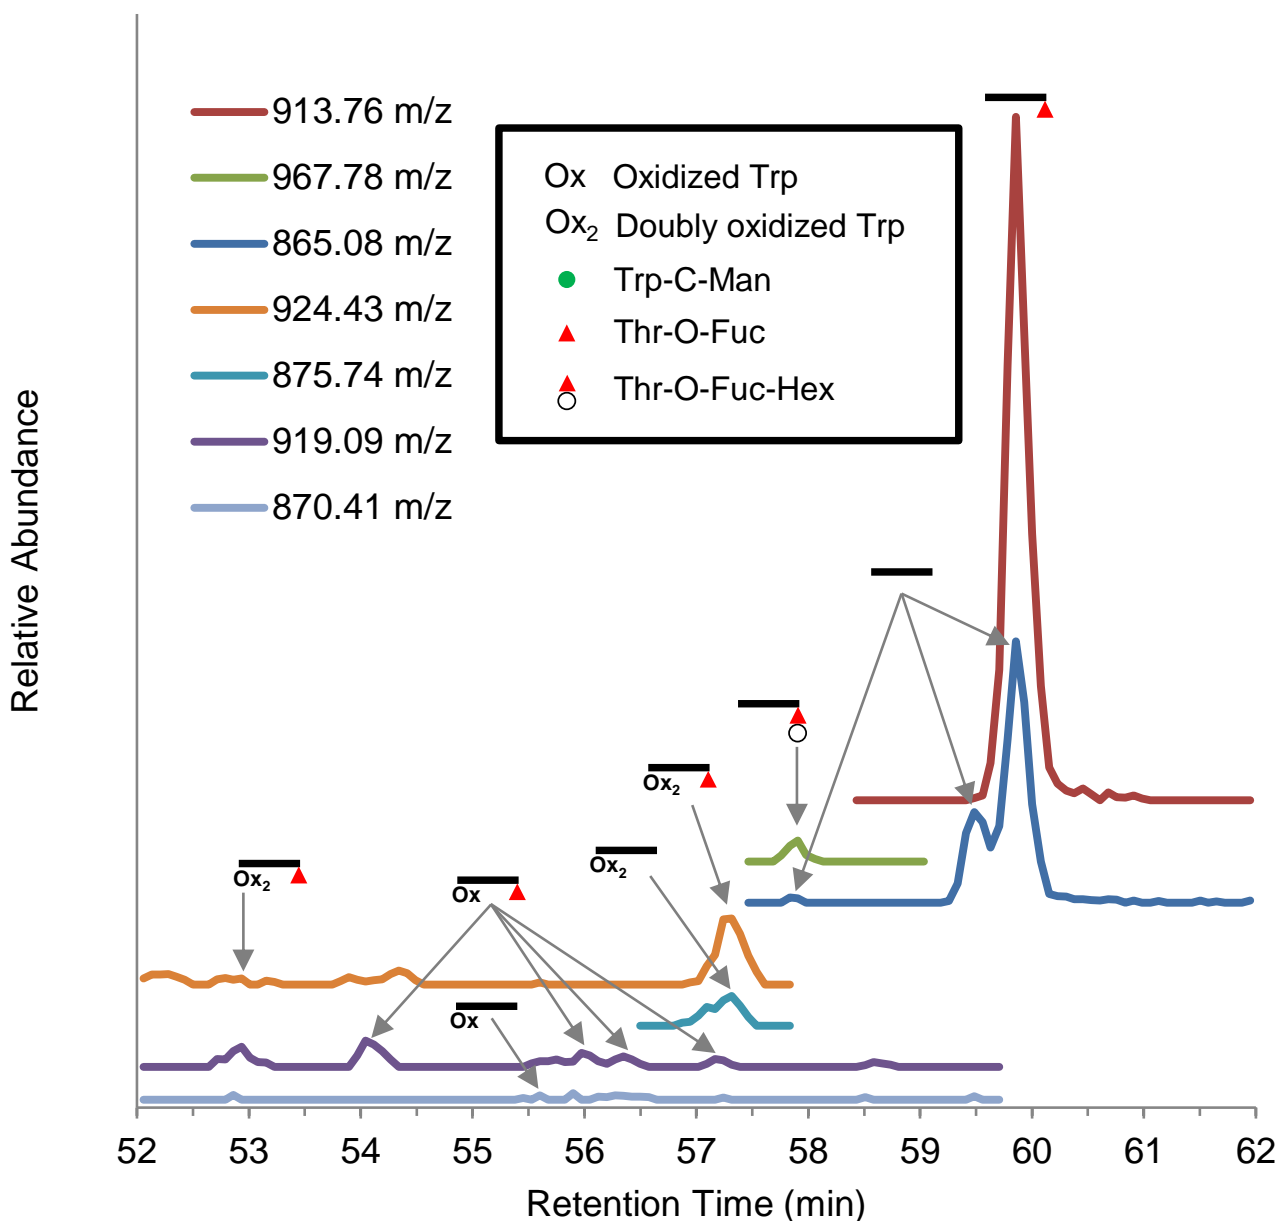

**Figure S6. Representative XIC of glycosylated CSP from *P. falciparum* salivary gland sporozoites.** The variably oxidized Trp and the variably O-fucosylated Thr are underlined. Traces are offset for clarity. Peaks indicated with arrows were positively identified by PSMs. The Hex of the O-Fuc-Hex disaccharide is indicated as a generic hexose because the identity of the glycan has not been confirmed.

***P. falciparum* salivary gland sporozoites**  
**Whole proteome**

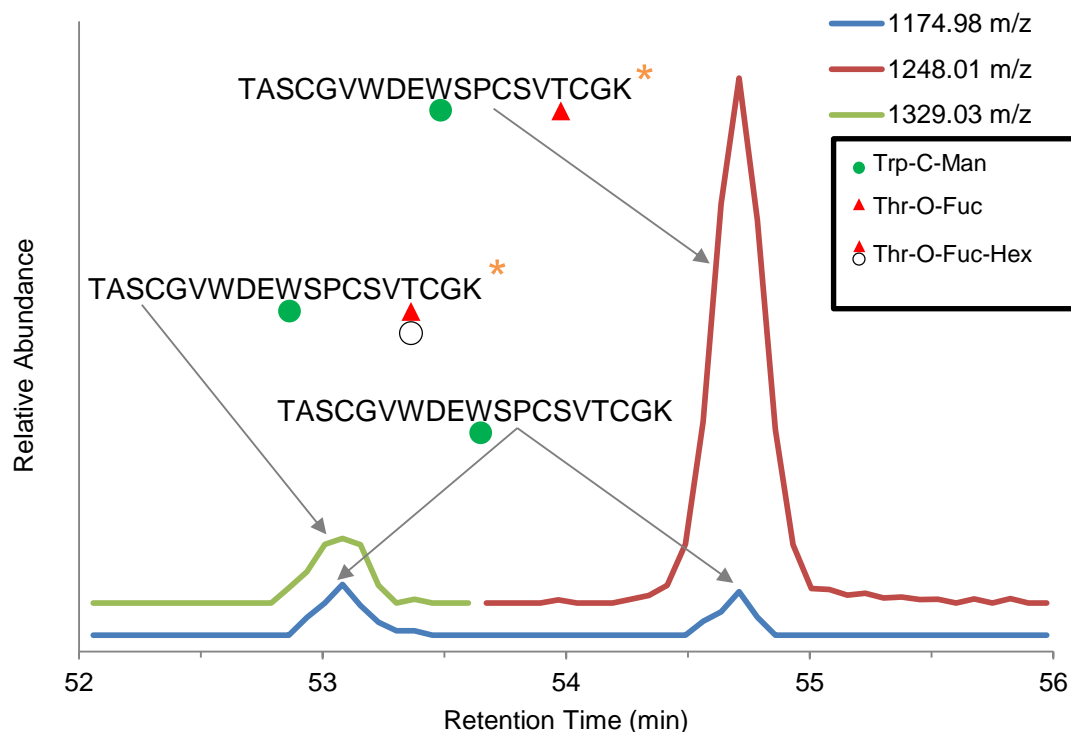

***P. falciparum* salivary gland sporozoites**  
**Surface-enriched**

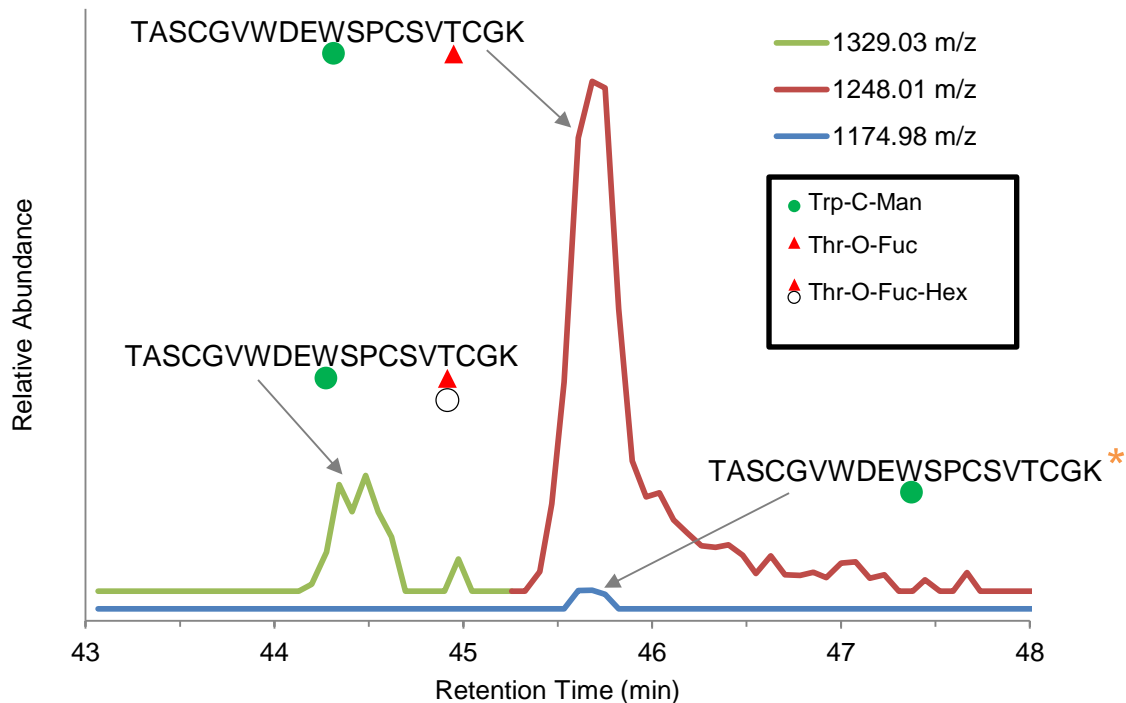

**Figure S7. Representative XIC of glycosylated TRAP from *P. falciparum* salivary gland sporozoites.** Traces are offset for clarity. Peaks marked with an orange asterisk (\*) were not identified by PSMs because the precursor was not selected for MS<sup>2</sup>, but their retention time and mass correspond with the indicated glycoform. The Hex of the O-Fuc-Hex disaccharide is indicated as a generic hexose because the identity of the glycan has not been confirmed.

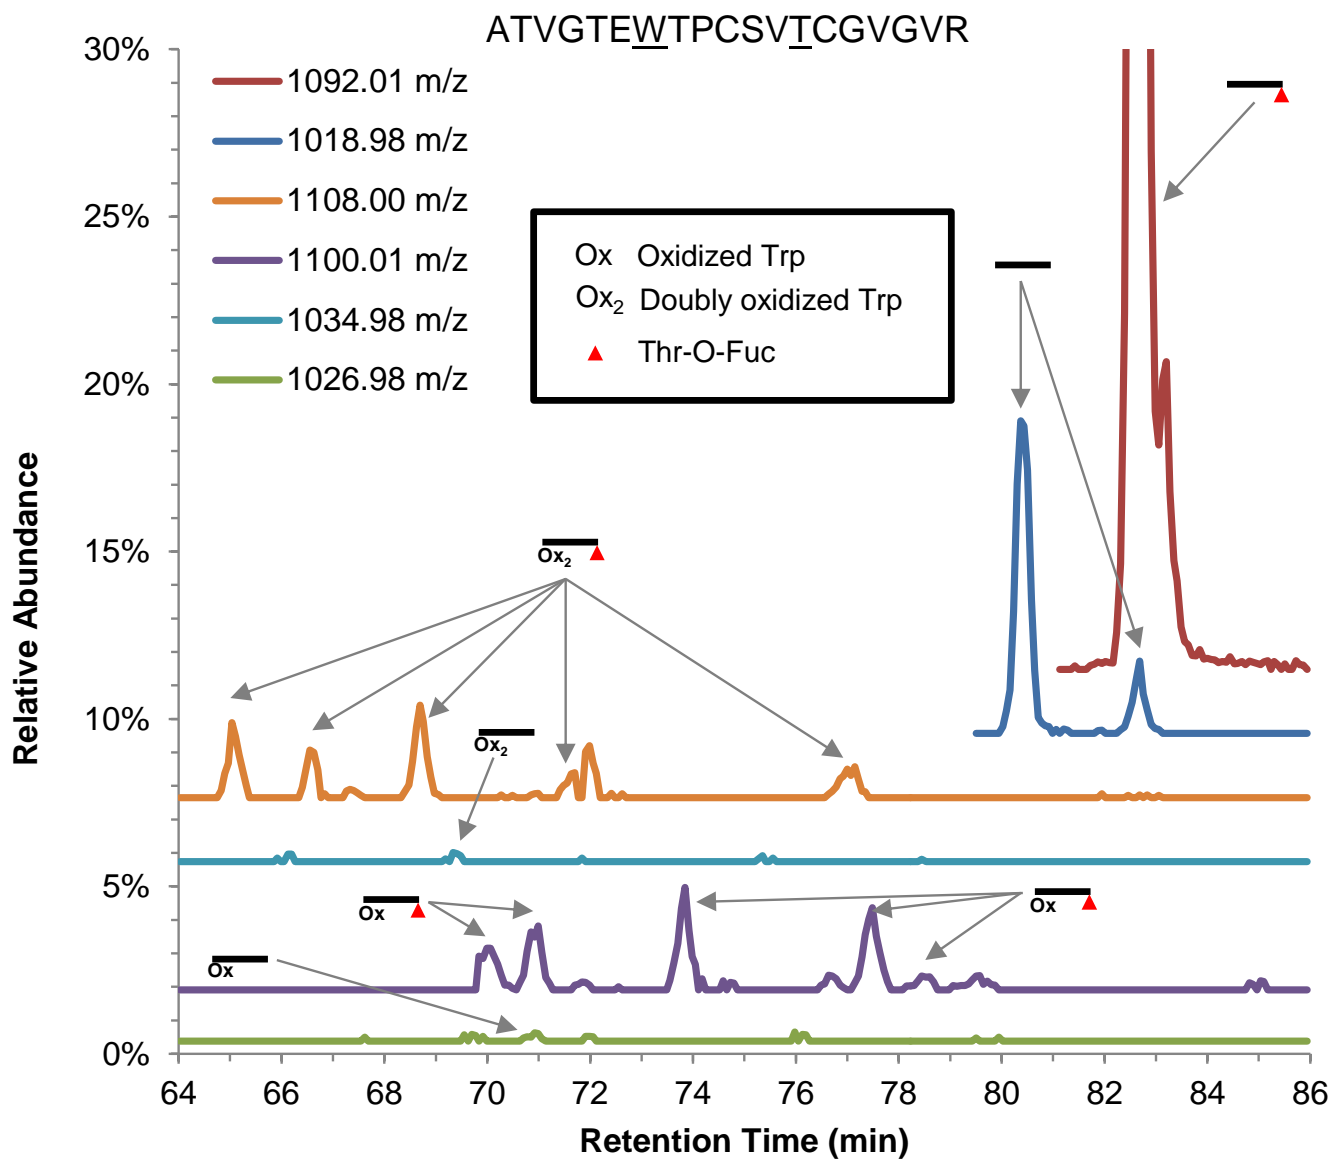

**Figure S8. Representative XIC of glycosylated CSP from *P. vivax* VK210 salivary gland sporozoites.** The variably oxidized Trp and the variably O-fucosylated Thr are underlined. Traces are offset for clarity. Peaks indicated with arrows were positively identified by PSMs.

# VANCGPWDPWTACSVTCGR

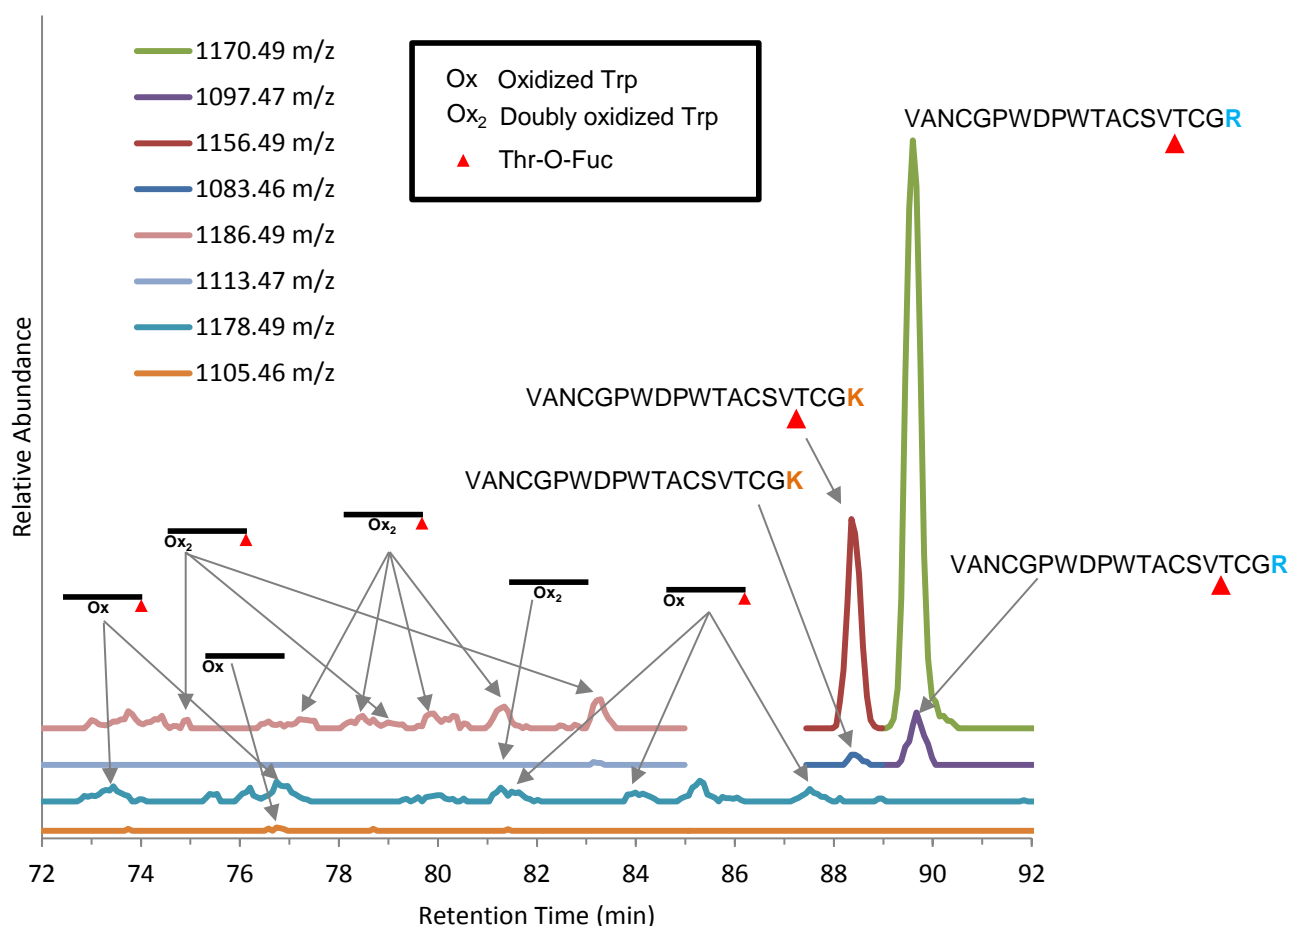

**Figure S9. Representative XIC of glycosylated TRAP from *P. vivax* VK210 salivary gland sporozoites.** The variably oxidized Trp residues and the variably O-fucosylated Thr are underlined. Traces are offset for clarity. Peaks indicated with arrows were positively identified by PSMs. Note that this sample contained a mixture of two field isolates, each of which carried a different version of the TRAP gene with either a Lys or Arg at the C-terminus of the glycopeptide.

ATVGTEWTPCSVICGVGVR

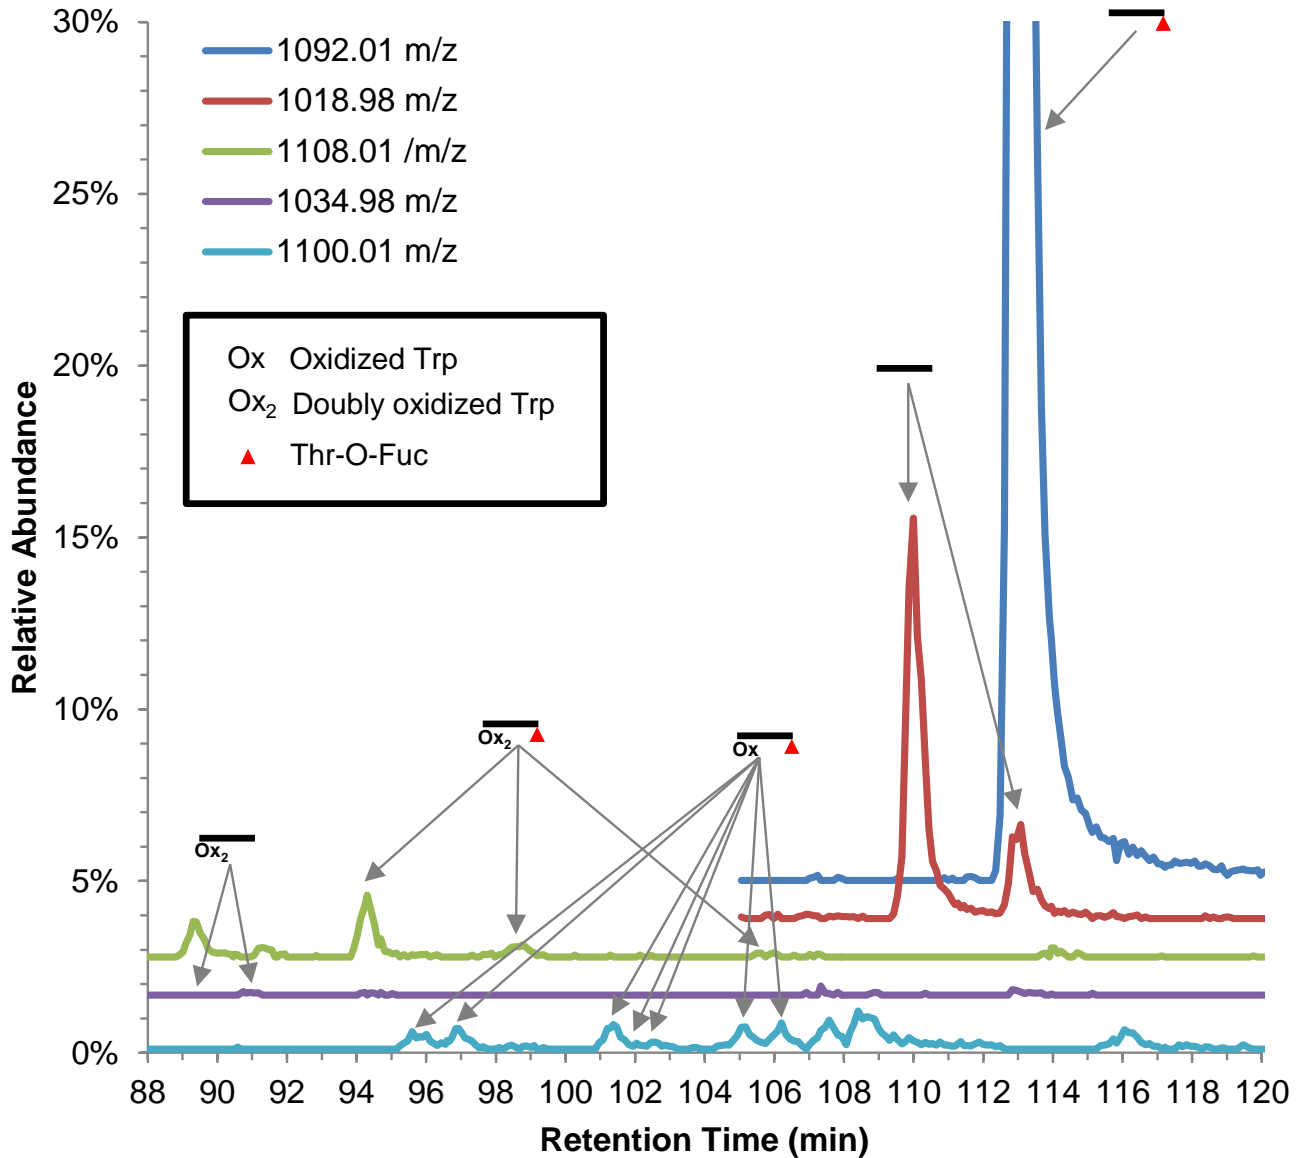

**Figure S10. Representative XIC of glycosylated CSP from *P. vivax* VK247 salivary gland sporozoites.** The variably oxidized Trp and the variably O-fucosylated Thr are underlined. Traces are offset for clarity. Peaks indicated with arrows were positively identified by PSMs.



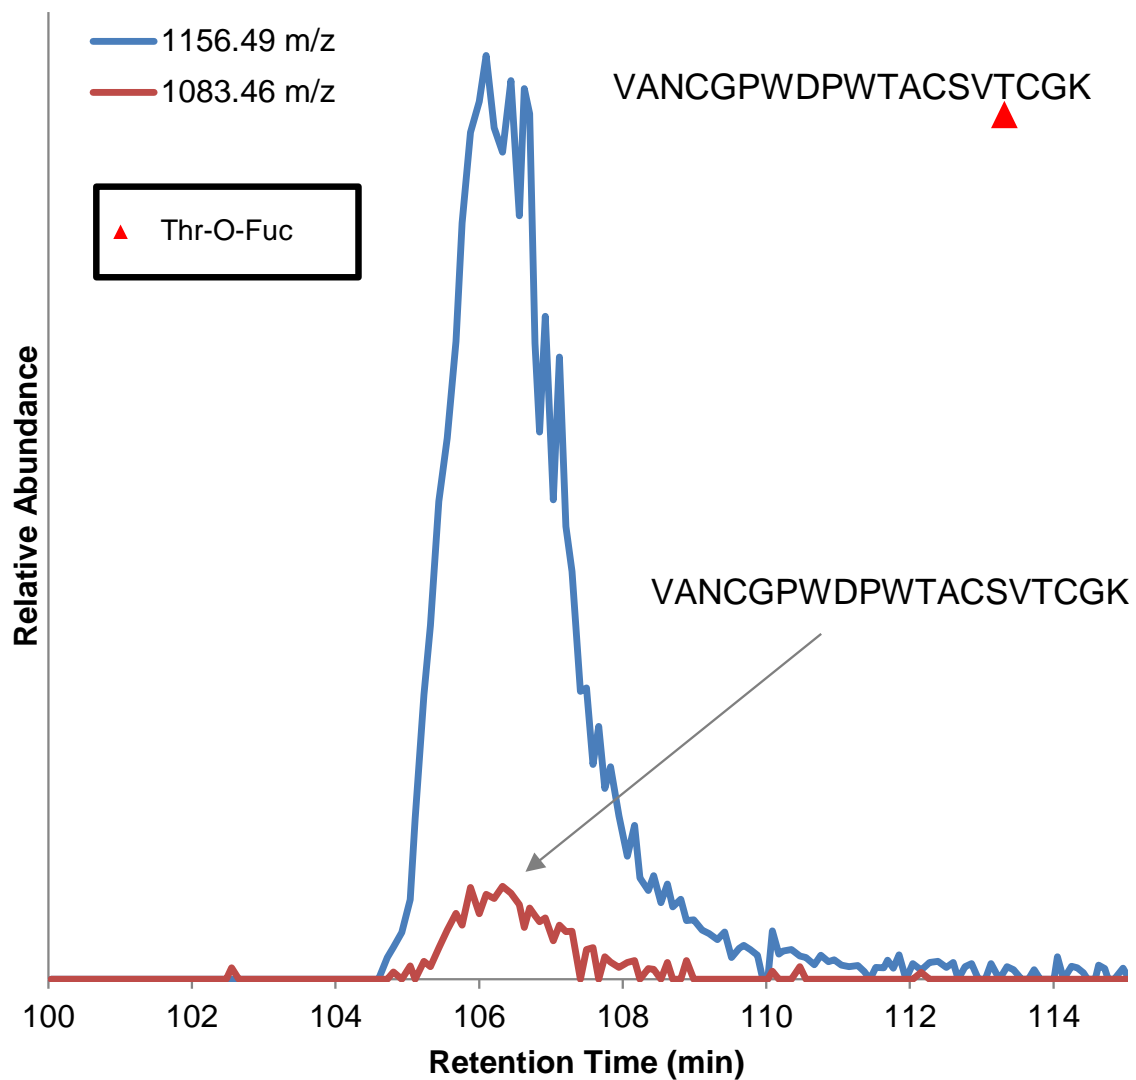

**Figure S11. Representative XIC of glycosylated TRAP from *P. vivax* VK247 salivary gland sporozoites.**

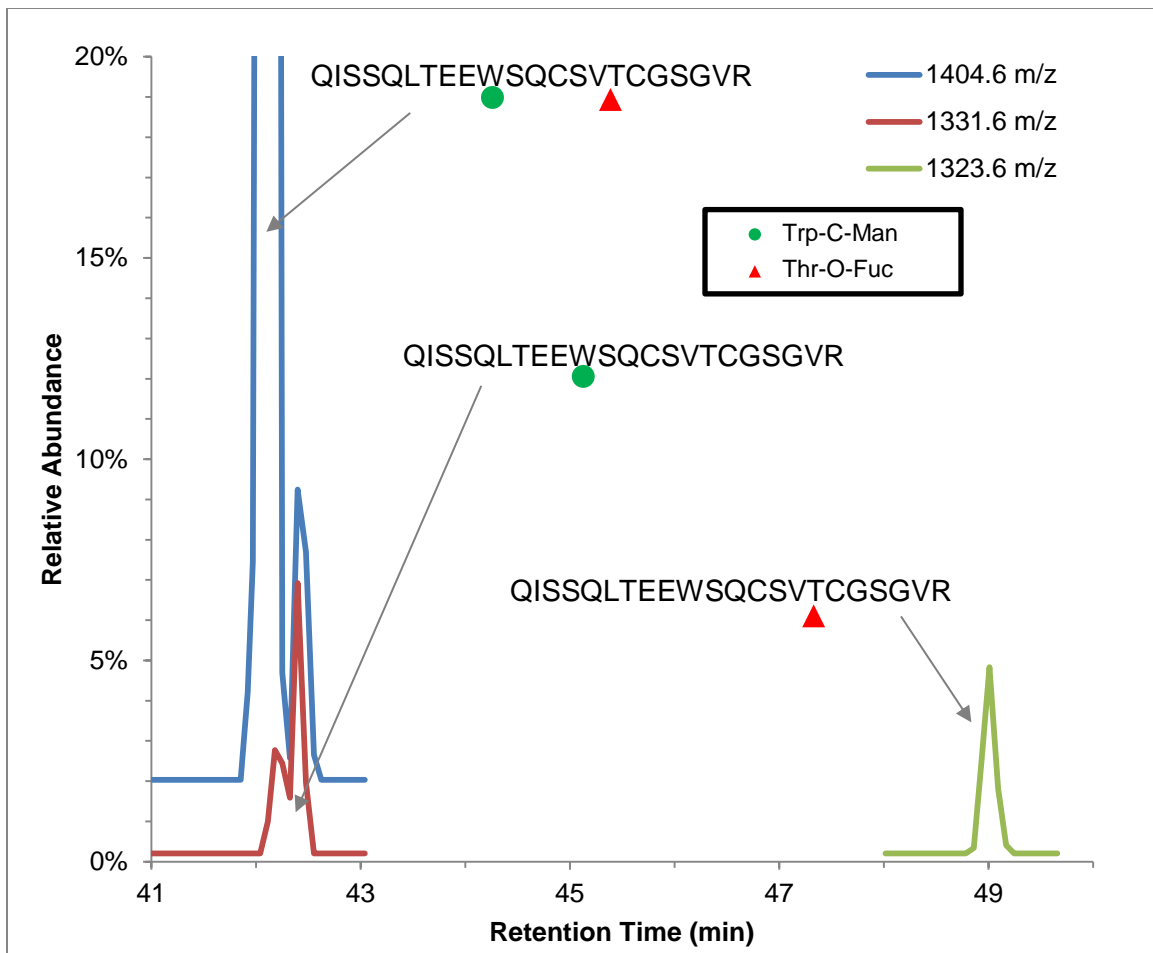

**Figure S12. Representative XIC of glycosylated CSP from *P. yoelii* salivary gland sporozoites.** Traces are offset for clarity. The reason for the doublet shape of the 1404.6 *m/z* and co-eluting 1331.6 *m/z* peaks is unknown, and may reflect spray instability or closely eluting isobaric species. Only the indicated glycopeptides were identified from MS<sup>2</sup> of these masses collected during the elution window of the peaks.

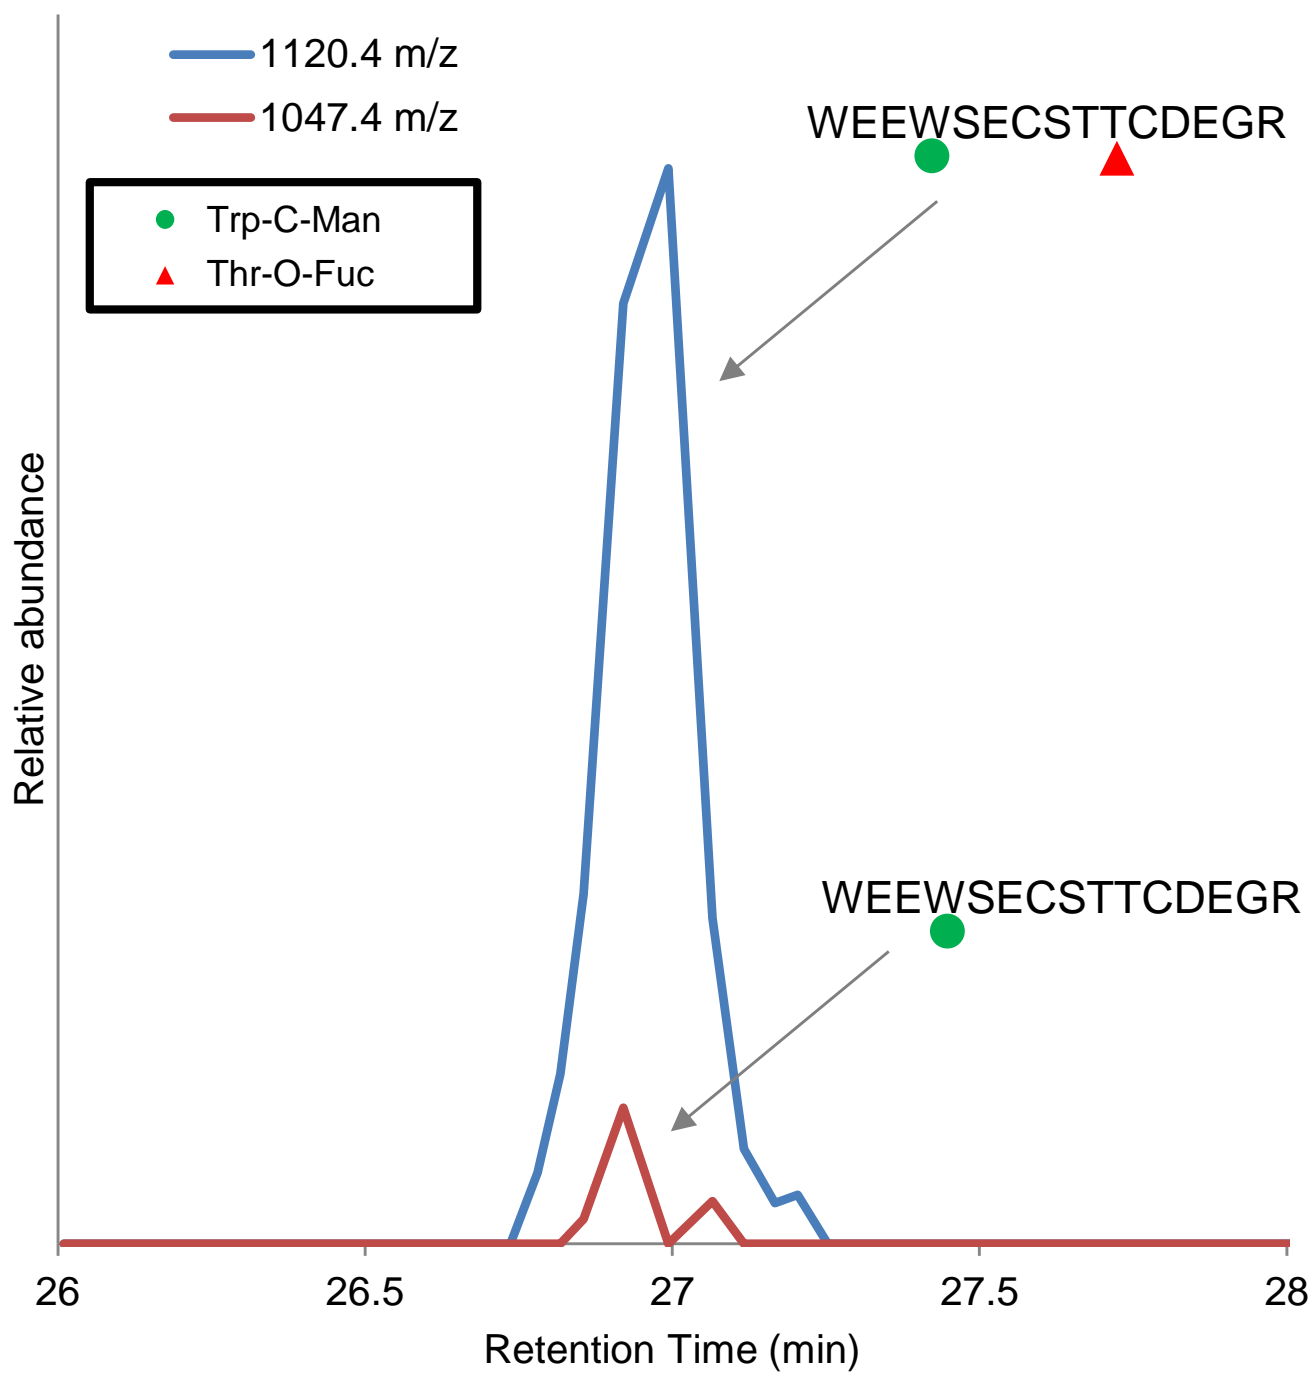

**Figure S13.** Representative XIC of glycosylated TRAP from *P. yoelii* salivary gland sporozoites.

**Ions:**

a ☐ 1+ ☐ 2+ ☐ 3+  
b ☒ 1+ ☐ 2+ ☐ 3+  
c ☐ 1+ ☐ 2+ ☐ 3+  
x ☐ 1+ ☐ 2+ ☐ 3+  
y ☒ 1+ ☐ 2+ ☐ 3+  
z ☐ 1+ ☐ 2+ ☐ 3+  
[\[Deselect All\]](#)

**Neutral Loss:**

☐ NH<sub>3</sub> (\*)  
☒ H<sub>2</sub>O (o)  
☐ H<sub>3</sub>PO<sub>4</sub> (p)  
☒ C<sub>4</sub>H<sub>8</sub>O<sub>4</sub> (-120)  
☐ Immonium ions  
☐ Reporter ions  
☒ Precursor ions

**Mass Type:**

☒ Mono ☐ Avg

**Mass Tol:** 0.5

☒ Th ☐ ppm

**Update**

**Peak Assignment:**

☒ Most Intense  
☐ Nearest Match  
☒ Peak Detect

**Peak Labels:**

☒ Ion ☐ m/z  
☐ None

**Width:** 650

**Height:** 400

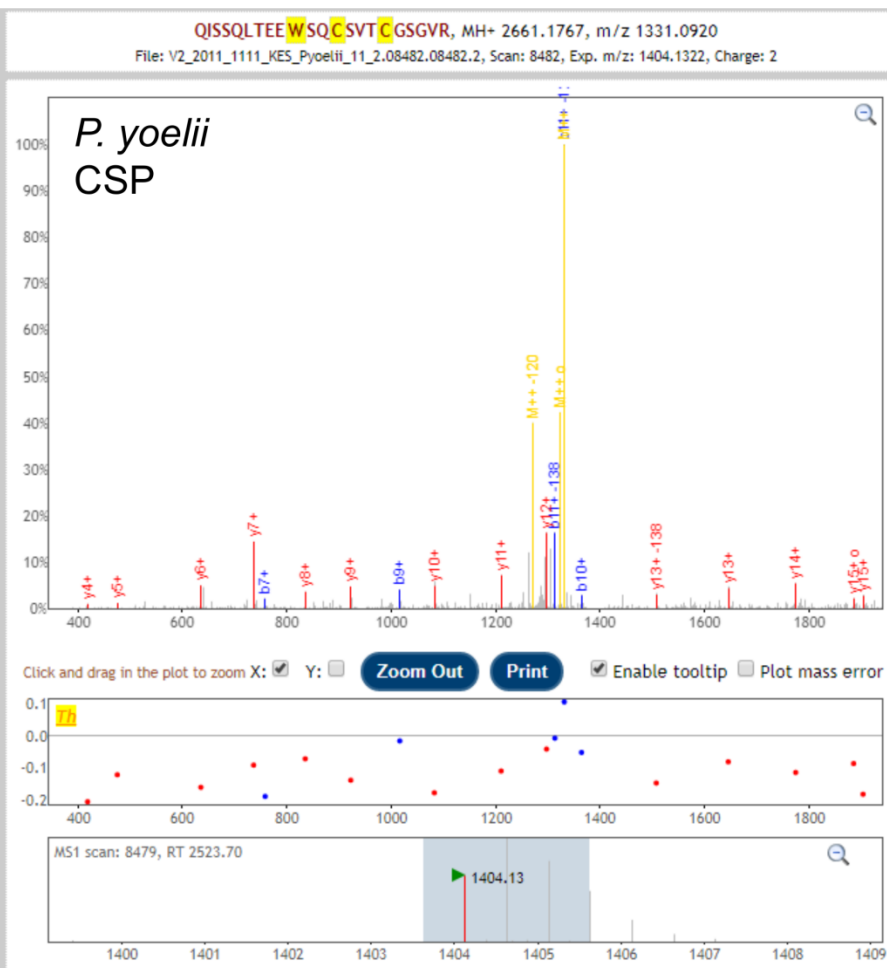

| b+        | #  | Seq | #  | y+        |
|-----------|----|-----|----|-----------|
| 129.0659  | 1  | Q   | 22 |           |
| 242.1499  | 2  | I   | 21 | 2533.1181 |
| 329.1819  | 3  | S   | 20 | 2420.0340 |
| 416.2140  | 4  | S   | 19 | 2333.0020 |
| 544.2726  | 5  | Q   | 18 | 2245.9700 |
| 657.3566  | 6  | L   | 17 | 2117.9114 |
| 758.4043  | 7  | T   | 16 | 2004.8273 |
| 887.4469  | 8  | E   | 15 | 1903.7797 |
| 1016.4895 | 9  | E   | 14 | 1774.7371 |
| 1364.6216 | 10 | W   | 13 | 1645.6945 |
| 1451.6536 | 11 | S   | 12 | 1297.5623 |
| 1579.7122 | 12 | Q   | 11 | 1210.5303 |
| 1739.7429 | 13 | C   | 10 | 1082.4717 |
| 1826.7749 | 14 | S   | 9  | 922.4411  |
| 1925.8433 | 15 | V   | 8  | 835.4091  |
| 2026.8910 | 16 | T   | 7  | 736.3406  |
| 2186.9216 | 17 | C   | 6  | 635.2930  |
| 2243.9431 | 18 | G   | 5  | 475.2623  |
| 2330.9751 | 19 | S   | 4  | 418.2409  |
| 2387.9966 | 20 | G   | 3  | 331.2088  |
| 2487.0650 | 21 | V   | 2  | 274.1874  |
|           | 22 | R   | 1  | 175.1190  |

[\[Click\]](#) to move table

Variable Modifications:  
C: 57.021464 [13, 17]  
W: 162.052824 [10]

**Ions:**

a ☐ 1+ ☐ 2+ ☐ 3+  
b ☒ 1+ ☐ 2+ ☐ 3+  
c ☐ 1+ ☐ 2+ ☐ 3+  
x ☐ 1+ ☐ 2+ ☐ 3+  
y ☒ 1+ ☐ 2+ ☐ 3+  
z ☐ 1+ ☐ 2+ ☐ 3+  
[\[Deselect All\]](#)

**Neutral Loss:**

☐ NH<sub>3</sub> (\*)  
☒ H<sub>2</sub>O (o)  
☐ H<sub>3</sub>PO<sub>4</sub> (p)  
☒ C<sub>4</sub>H<sub>8</sub>O<sub>4</sub> (-120)  
☐ Immonium ions  
☐ Reporter ions  
☒ Precursor ions

**Mass Type:**

☒ Mono ☐ Avg

**Mass Tol:** .4

☒ Th ☐ ppm

**Update**

**Peak Assignment:**

☒ Most Intense  
☐ Nearest Match  
☒ Peak Detect

**Peak Labels:**

☒ Ion ☐ m/z  
☐ None

**Width:** 650

**Height:** 400

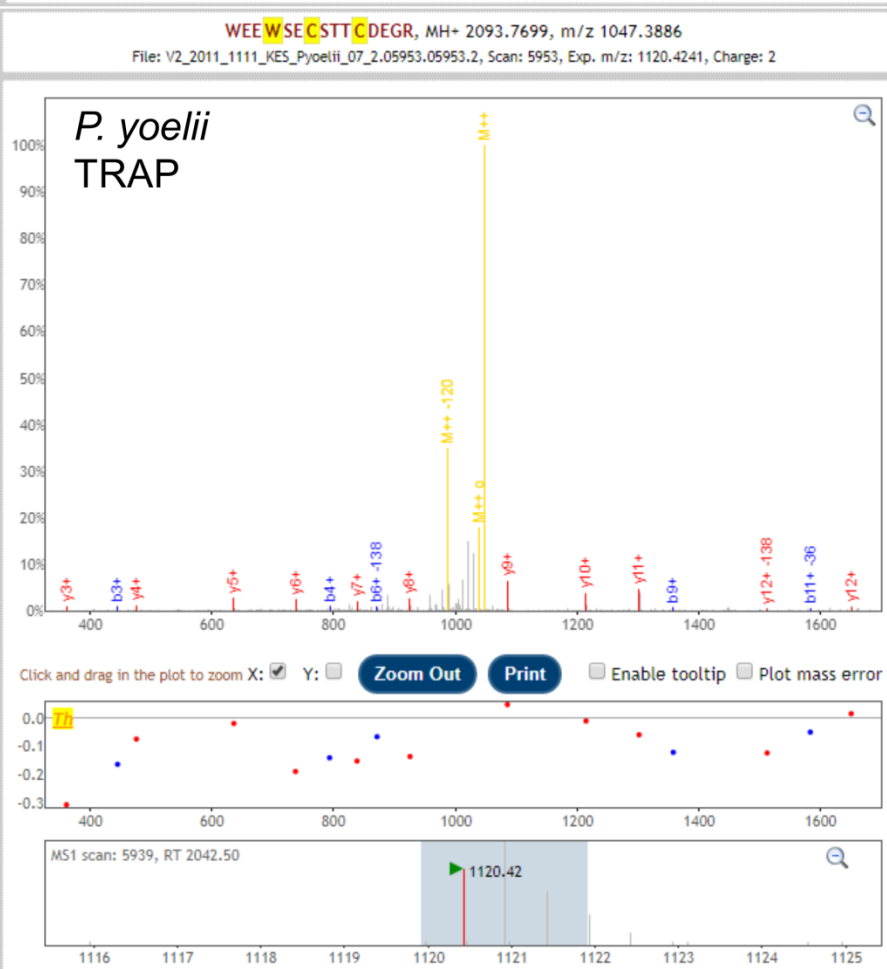

| b+        | #  | Seq | #  | y+        |
|-----------|----|-----|----|-----------|
| 187.0866  | 1  | W   | 15 |           |
| 316.1292  | 2  | E   | 14 | 1907.6906 |
| 445.1718  | 3  | E   | 13 | 1778.6480 |
| 793.3039  | 4  | W   | 12 | 1649.6054 |
| 880.3359  | 5  | S   | 11 | 1301.4733 |
| 1009.3785 | 6  | E   | 10 | 1214.4412 |
| 1169.4092 | 7  | C   | 9  | 1085.3986 |
| 1256.4412 | 8  | S   | 8  | 925.3680  |
| 1357.4889 | 9  | T   | 7  | 838.3360  |
| 1458.5366 | 10 | T   | 6  | 737.2883  |
| 1618.5672 | 11 | C   | 5  | 636.2406  |
| 1733.5942 | 12 | D   | 4  | 476.2100  |
| 1862.6368 | 13 | E   | 3  | 361.1830  |
| 1919.6582 | 14 | G   | 2  | 232.1404  |
|           | 15 | R   | 1  | 175.1190  |

[\[Click\]](#) to move table

Variable Modifications:  
C: 57.021464 [7, 11]  
W: 162.052824 [4]

**Figure S14. Automated identification of TSR glycosylation in *P. yoelii* salivary gland sporozoites.** A previously published proteomic analysis of salivary gland sporozoites of the rodent-infective *Plasmodium* species *P. yoelii* (Lindner and Swearingen *et al.* 2013 PMID:23325771) was re-analyzed with the mass offset approach described here, providing the first reported evidence of O-fucosylation and C-mannosylation of TSR domains in that species. Sample MS<sup>2</sup> spectra for the CSP peptide (top) and the TRAP peptide (bottom) are shown as automatically annotated by the Lorikeet spectrum viewer incorporated into the TPP. Both examples show a mass difference of -146.06 Da between the observed precursor *m/z* and that of the matched peptide, corresponding to neutral loss of O-Fuc. The C-mannosylated peptide precursor after neutral loss of O-Fuc is the dominant peak in both spectra (yellow peak annotated M++). In the CSP spectrum, this peak is isobaric with the b11-120 Da peak). Neutral loss of 120.04 Da from the M++ peak due to cross-ring cleavage of C-Man is also indicated.

Figure S15. Example false positive peptides showing neutral loss of O-linked glycans.

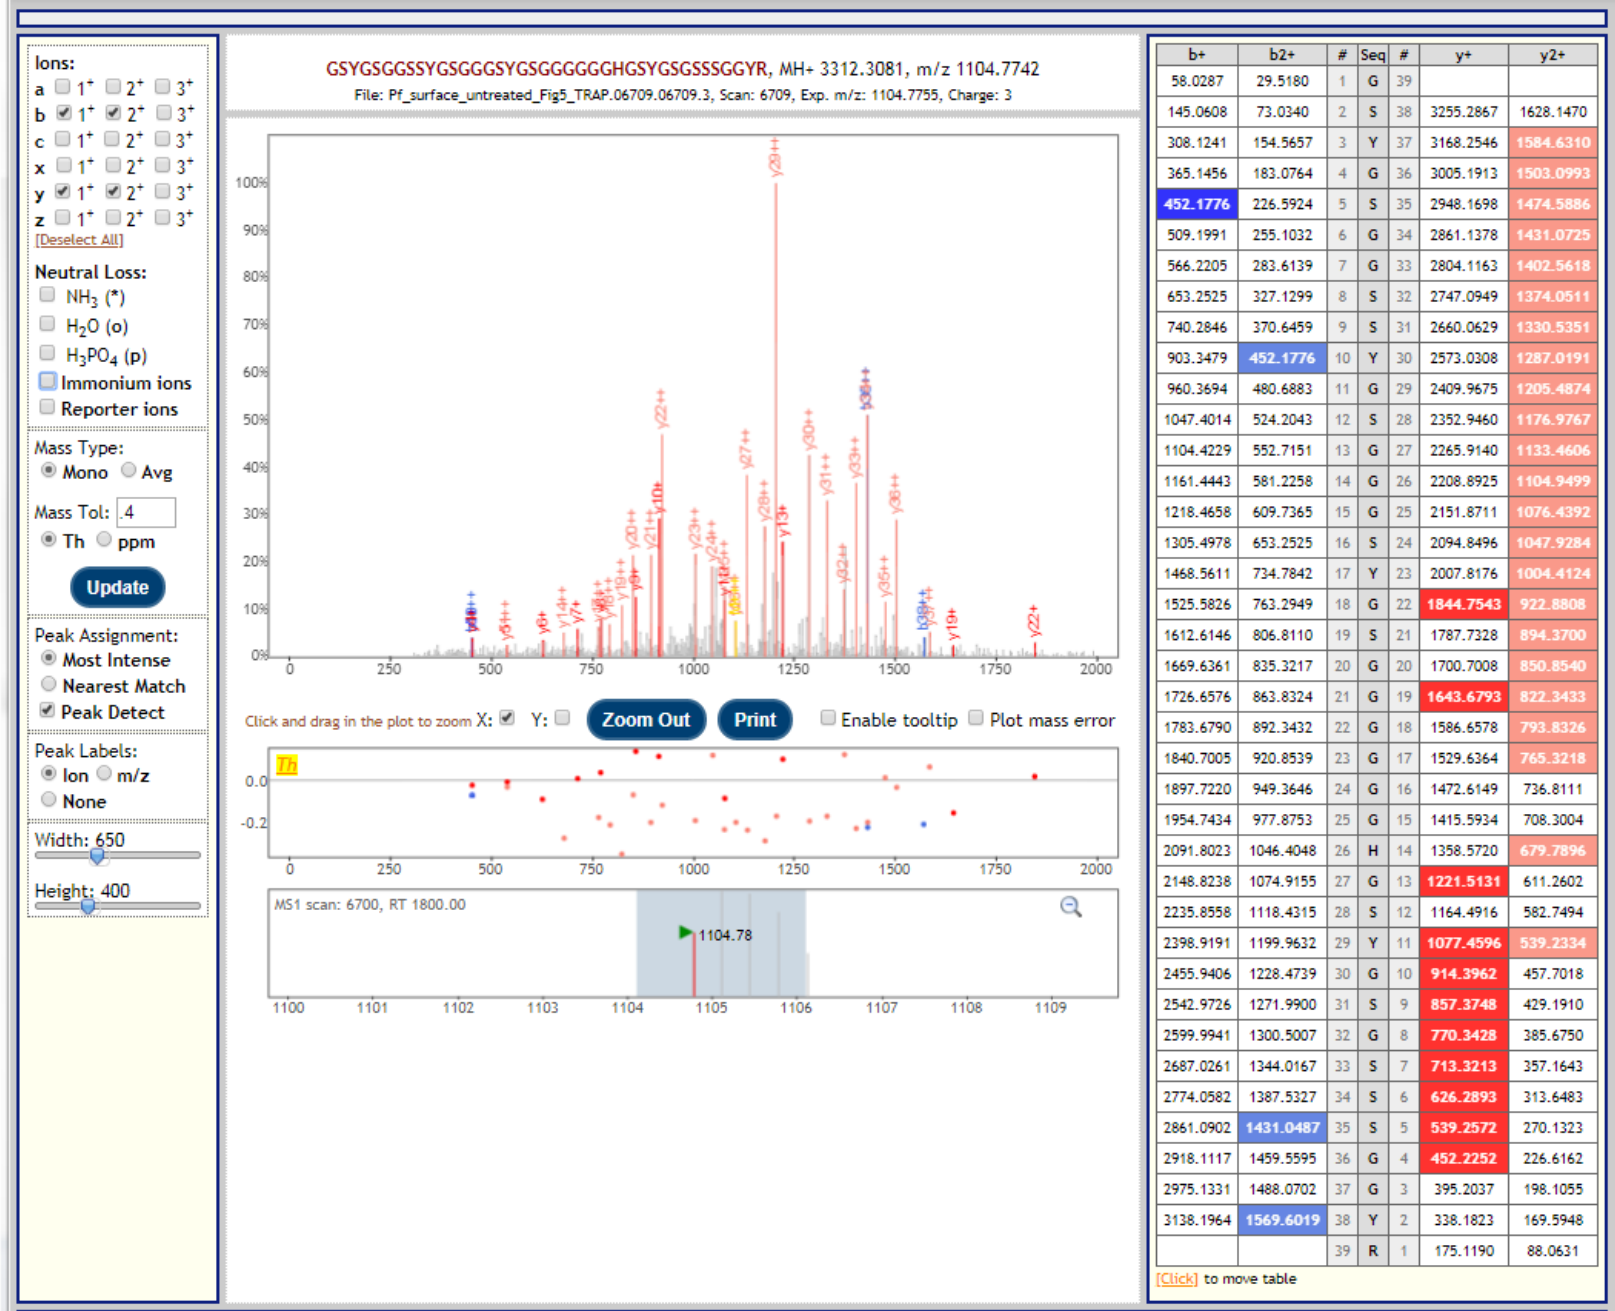

Figure S15a. A sample high-quality PSM identified the fully tryptic human keratin peptide GSYGSGGSSYSGGGSYSGGGGGGHGSYSGSSSGGYR.

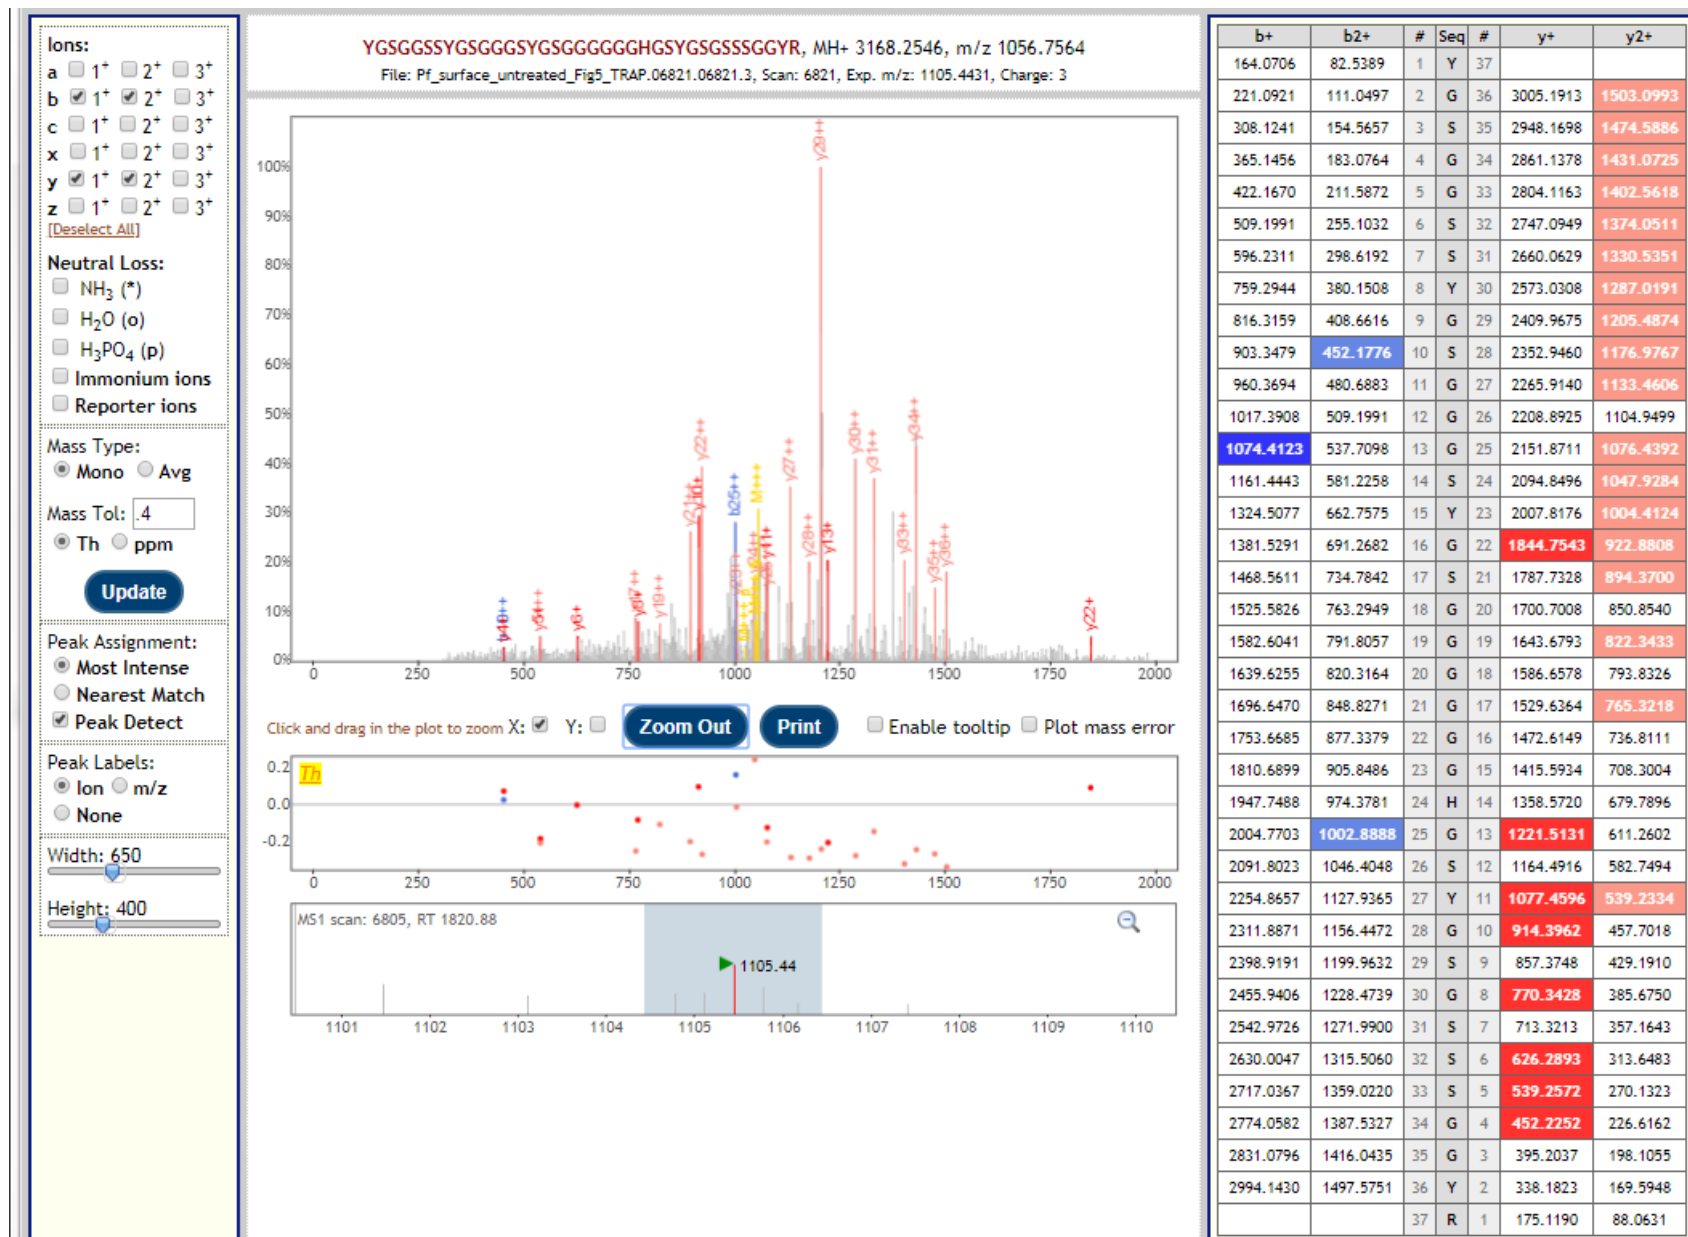

**Figure S15b.** A representative PSM identifying the same keratin peptide seen in Figure S15a, but spuriously identifying it as a semi-trypic fragment with neutral loss of 146.06. The semi-trypic fragment GS.YGS GGSYGS GGSYGS GGGGGHGSYGS GSSSGGYR has a mass loss of Gly-Ser = 144.05 Da. In addition, the +2H isotope peak 1105.44 *m/z* was incorrectly selected as the monoisotopic peak for this peptide. The total mass loss is then 144.05 + 2\*1.0078 = 146.07, which is within the matching tolerance of the searched-for neutral loss of 146.06 Da for putative loss of O-Fuc. Because of the extensive y-ion coverage, the PSM still received a high score. The more likely correct annotation is shown in Figure S15c.





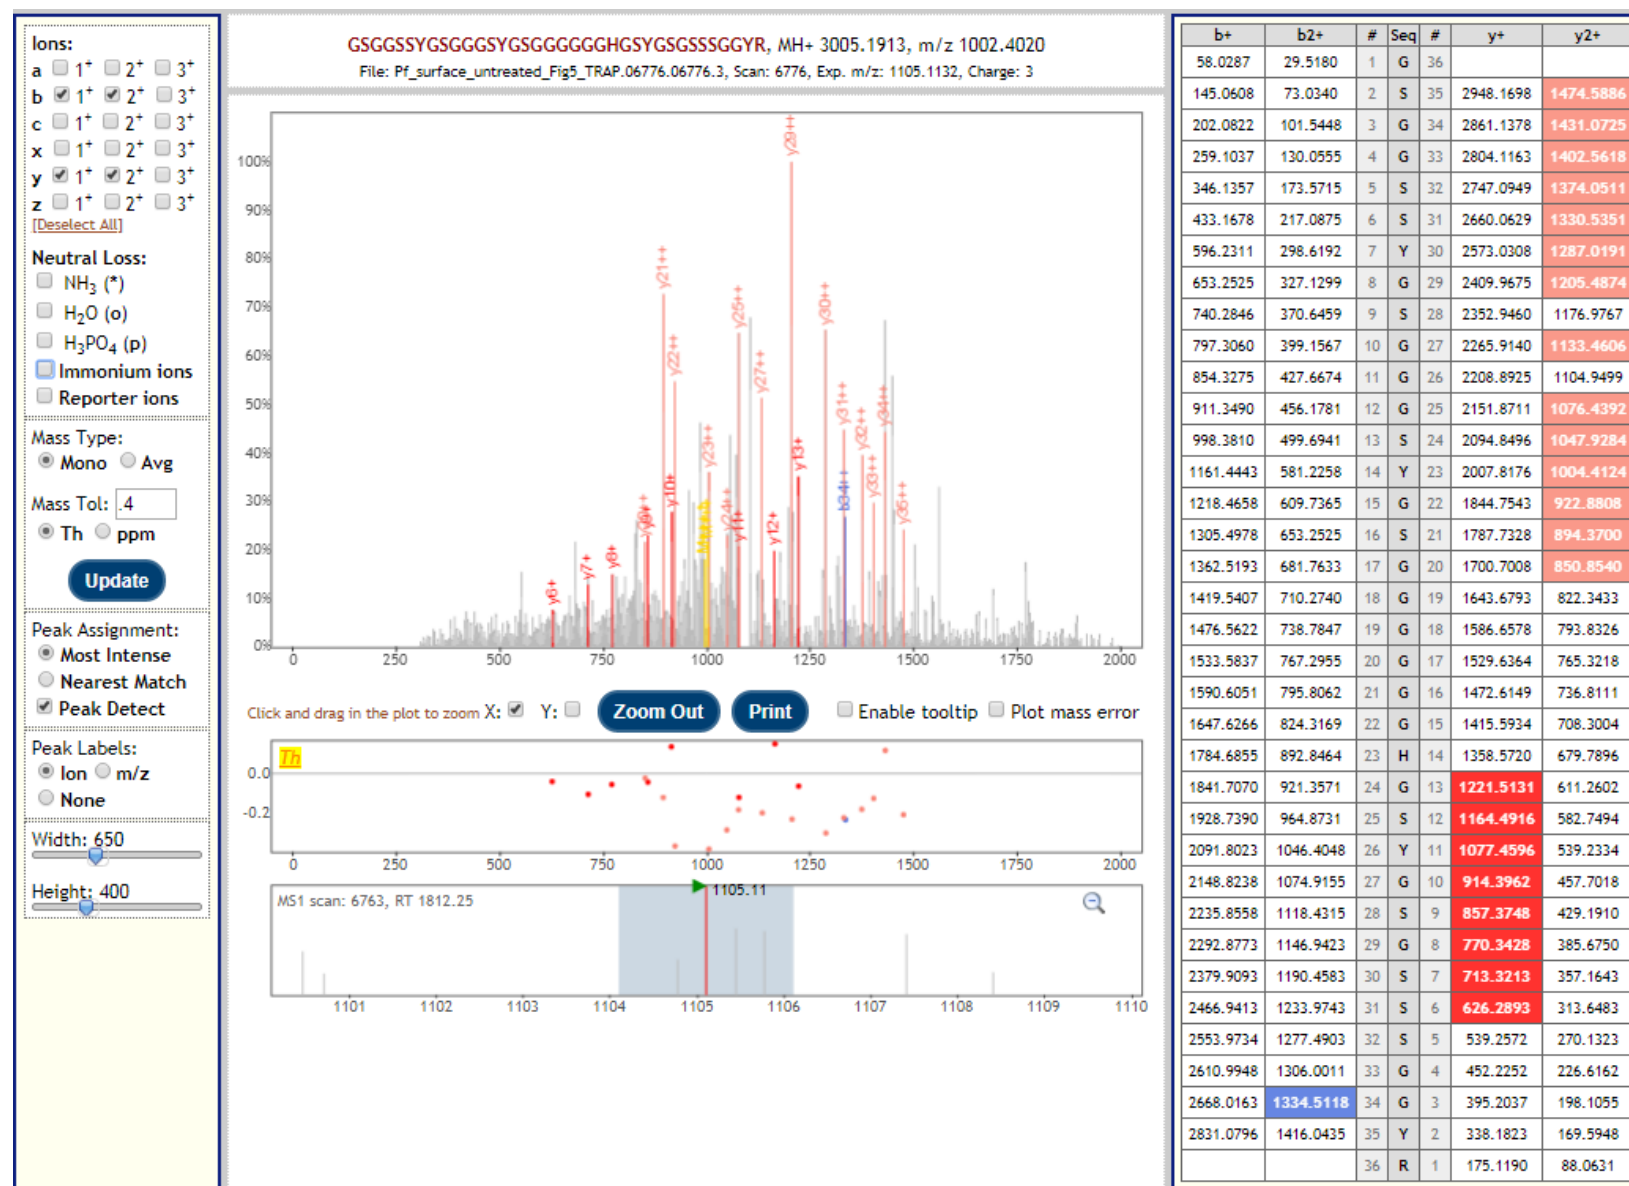

**Figure S15d.** A representative PSM identifying the same keratin peptide seen in Figure S15a, but spuriously identifying it as a semi-tryptic fragment with neutral loss of 308.11. The semi-tryptic fragment GSY.GSGGSSYSGGGSYSGGGGGHGSYSGSSSGGYR has a mass loss of Gly-Ser-Tyr = 307.12 Da. In addition, the +1H isotope peak 1105.11 *m/z* was incorrectly selected as the monoisotopic peak for this peptide. The total mass loss is then 307.12 + 1.0078 = 308.12, which is within the matching tolerance of the searched-for neutral loss of 308.11 Da for putative loss of O-Fuc-Glc. Because of the extensive y-ion coverage, the PSM still received a high score. The correct annotation is shown in Figure S15e.

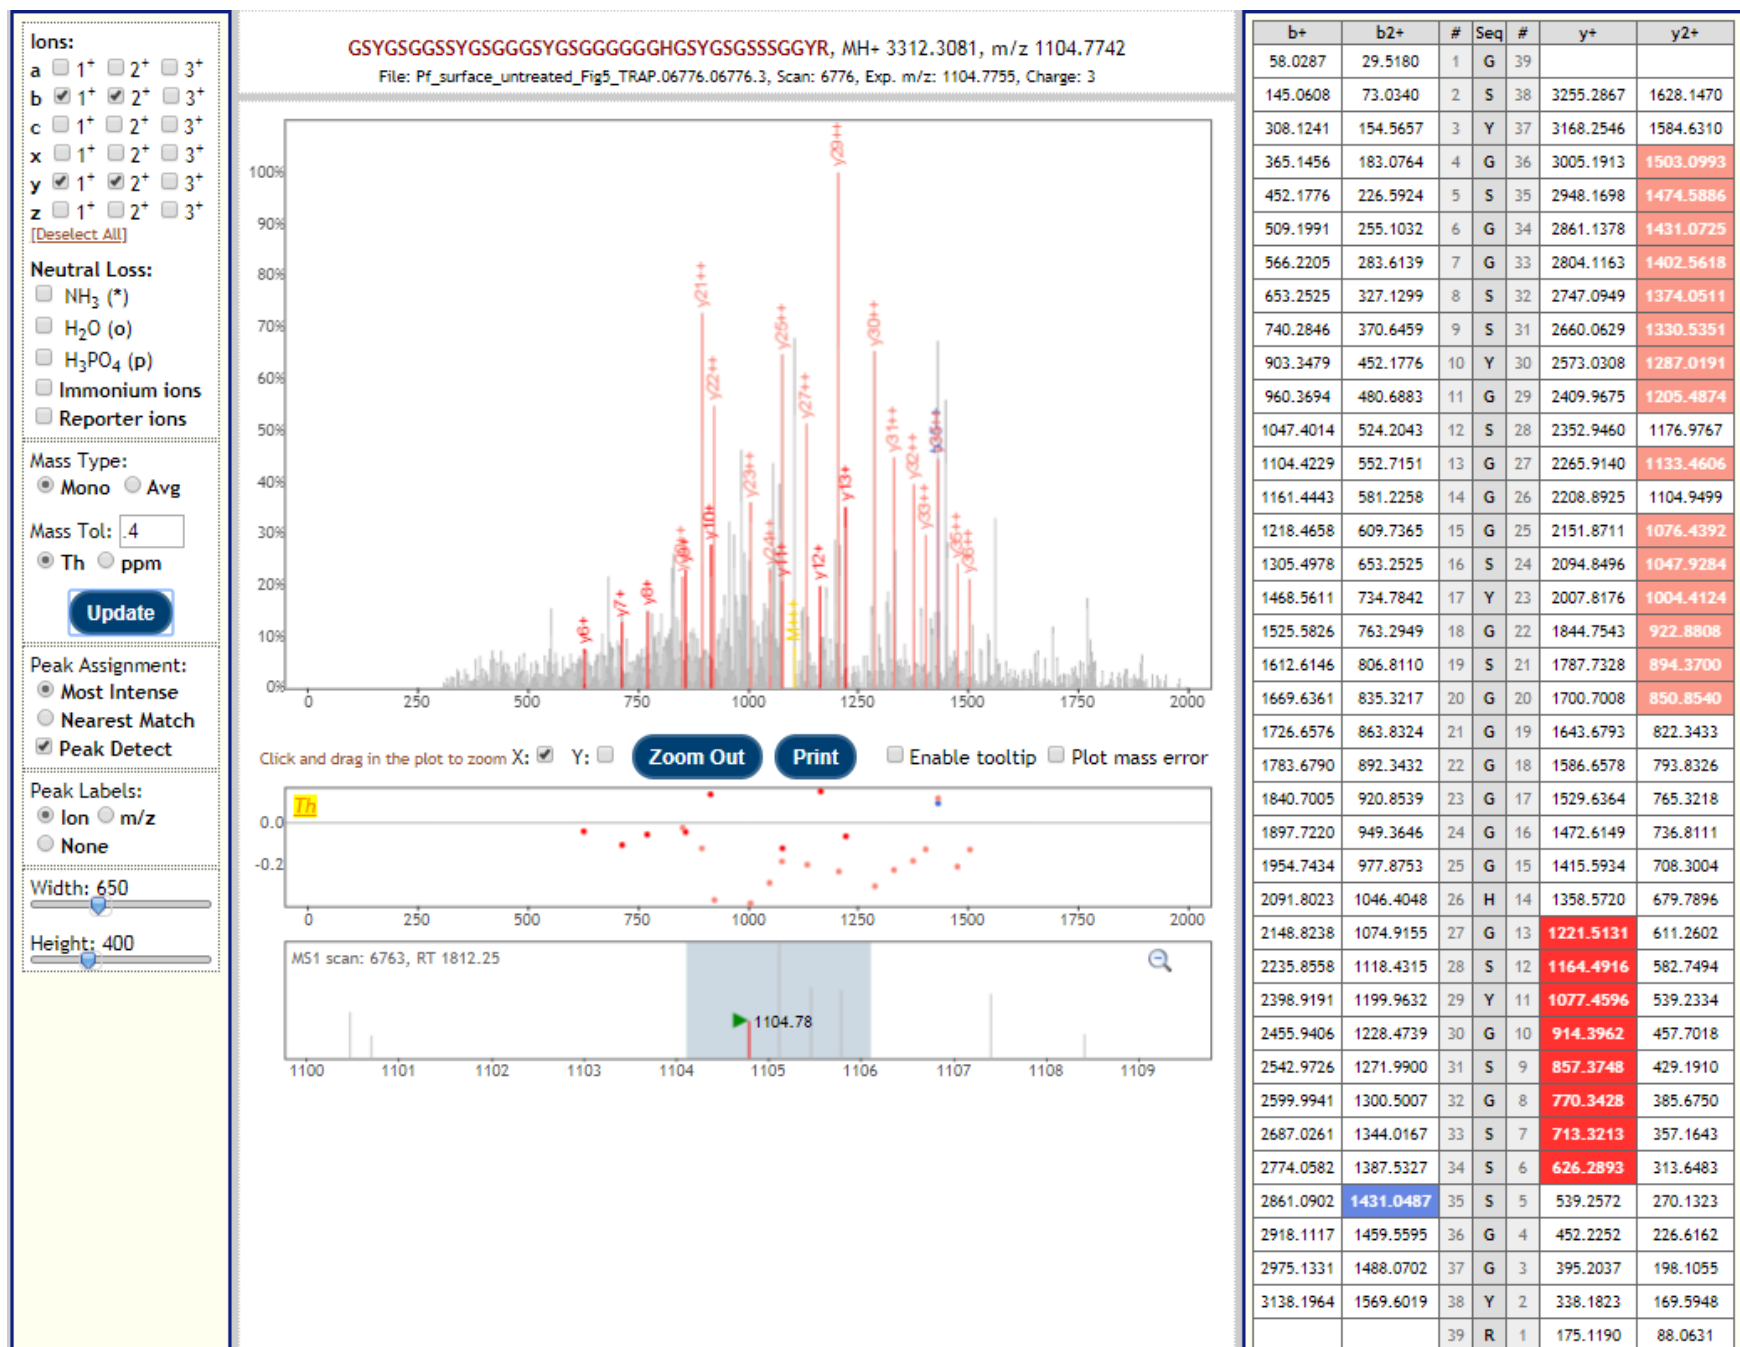

Supplement: Supplementary file 1 [file 13897640]
